# Supplementary material for: Uniparental expression of ribosomal RNA in ×Festulolium grasses: a link between the genome and nucleolar dominance
Source: Front Plant Sci. 2023 Sep 18;14:1276252. doi: 10.3389/fpls.2023.1276252 (PMC10544908; doi:10.3389/fpls.2023.1276252)
Supplement: Supplementary Table 1 — Quantification of sequences analysed in this study. For each genotype, the number of sequences (total and relative) and their attribution to parental types (homeologues) are given for DNA and cDNA templates. The ITS1 and ITS datasets are presented separately on separate sheets. [file Table_1.xlsx]

## Sheet: Legend
Supplementary Table 1. Quantification of sequences analysed in this study. For each genotype, the number of sequences (total and relative) and their attribution to parental types (homeologues) are given for DNA and cDNA templates. The ITS1 and ITS datasets are presented separately on separate sheets.

## Sheet: ITS1_dataset
hybrid combination/sample
	number of sequences			proportion of sequences (percent)
Festuca pratensis (4x) x Lolium multiflorum (4x)	Festuca-type	Lolium-type	total	Festuca-type	Lolium-type	Cross	Generation	Template	Region
FL6_ITS1_cDNA_number of sequences	0	756	756	0	100	FpxLm	F1	cDNA	ITS1
FL6_ITS1_cDNA_number of ribotypes	0	34	34	0	100	FpxLm	F1	cDNA	ITS1
FL6_ITS1_DNA_number of sequences	1716	14551	16267	10.55	89.45	FpxLm	F1	DNA	ITS1
FL6_ITS1_DNA_number of ribotypes	120	762	882	13.61	86.39	FpxLm	F1	DNA	ITS1
FL7_ITS1_cDNA_number of sequences	1	1593	1594	0.06	99.94	FpxLm	F1	cDNA	ITS1
FL7_ITS1_cDNA_number of ribotypes	1	127	128	0.78	99.22	FpxLm	F1	cDNA	ITS1
FL7_ITS1_DNA_number of sequences	7947	9825	17772	44.72	55.28	FpxLm	F1	DNA	ITS1
FL7_ITS1_DNA_number of ribotypes	399	685	1084	36.81	63.19	FpxLm	F1	DNA	ITS1
FL8_ITS1_cDNA_number of sequences	7	4433	4440	0.16	99.84	FpxLm	F1	cDNA	ITS1
FL8_ITS1_cDNA_number of ribotypes	1	244	245	0.41	99.59	FpxLm	F1	cDNA	ITS1
FL8_ITS1_DNA_number of sequences	8944	12116	21060	42.47	57.53	FpxLm	F1	DNA	ITS1
FL8_ITS1_DNA_number of ribotypes	576	654	1230	46.83	53.17	FpxLm	F1	DNA	ITS1
FL9_ITS1_cDNA_number of sequences	4	894	898	0.45	99.55	FpxLm	F1	cDNA	ITS1
FL9_ITS1_cDNA_number of ribotypes	4	63	67	5.97	94.03	FpxLm	F1	cDNA	ITS1
FL9_ITS1_DNA_number of sequences	9778	11382	21160	46.21	53.79	FpxLm	F1	DNA	ITS1
FL9_ITS1_DNA_number of ribotypes	481	775	1256	38.3	61.7	FpxLm	F1	DNA	ITS1
FL10_ITS1_cDNA_number of sequences	4	608	612	0.65	99.35	FpxLm	F1	cDNA	ITS1
FL10_ITS1_cDNA_number of ribotypes	1	51	52	1.92	98.08	FpxLm	F1	cDNA	ITS1
FL10_ITS1_DNA_number of sequences	6604	8850	15454	42.73	57.27	FpxLm	F1	DNA	ITS1
FL10_ITS1_DNA_number of ribotypes	473	543	1016	46.56	53.44	FpxLm	F1	DNA	ITS1
cDNA_number of sequences	16	8284	8300
cDNA_average number of sequences	3.2	1656.8	1660	0.264	99.736
cDNA_average number of sequences_st. dev.	2.77	1597.24	1599.13	0.28	0.28
DNA_number of sequences	34989	56724	91713
DNA_average number of sequences	11663	18908	30571	37.336	62.664
DNA_average number of sequences_st. dev.	3180.83	2202.82	2659.87	15.05	15.05
FL18_ITS1_cDNA_number of sequences	0	2047	2047	0	100	FpxLm	F2	cDNA	ITS1
FL18_ITS1_cDNA_number of ribotypes	0	115	115	0	100	FpxLm	F2	cDNA	ITS1
FL18_ITS1_DNA_number of sequences	4061	12971	17032	23.84	76.16	FpxLm	F2	DNA	ITS1
FL18_ITS1_DNA_number of ribotypes	346	600	946	36.58	63.42	FpxLm	F2	DNA	ITS1
FL19_ITS1_cDNA_number of sequences	2	4144	4146	0.05	99.95	FpxLm	F2	cDNA	ITS1
FL19_ITS1_cDNA_number of ribotypes	1	143	144	0.69	99.31	FpxLm	F2	cDNA	ITS1
FL19_ITS1_DNA_number of sequences	6998	12544	19542	35.81	64.19	FpxLm	F2	DNA	ITS1
FL19_ITS1_DNA_number of ribotypes	415	722	1137	36.5	63.5	FpxLm	F2	DNA	ITS1
cDNA_number of sequences	2	6191	6193
cDNA_average number of sequences	1	3095.5	3096.5	0.02	99.975
cDNA_average number of sequences_st. dev.	1.41	1482.8	1484.22	0.04	0.04
DNA_number of sequences	11059	25515	36574
DNA_average number of sequences	5529.5	12757.5	18287	29.825	70.175
DNA_average number of sequences_st. dev.	2076.77	301.93	1774.84	8.46	8.46
FL26_ITS1_cDNA_number of sequences	5	1873	1878	0.27	99.73	FpxLm	F3	cDNA	ITS1
FL26_ITS1_cDNA_number of ribotypes	2	169	171	1.17	98.83	FpxLm	F3	cDNA	ITS1
FL26_ITS1_DNA_number of sequences	10900	12640	23540	46.3	53.7	FpxLm	F3	DNA	ITS1
FL26_ITS1_DNA_number of ribotypes	583	665	1248	46.71	53.29	FpxLm	F3	DNA	ITS1
FL20_ITS1_cDNA_number of sequences	0	1210	1210	0	100	FpxLm	BC1	cDNA	ITS1
FL20_ITS1_cDNA_number of ribotypes	0	33	33	0	100	FpxLm	BC1	cDNA	ITS1
FL20_ITS1_DNA_number of sequences	4130	12625	16755	24.65	75.35	FpxLm	BC1	DNA	ITS1
FL20_ITS1_DNA_number of ribotypes	349	646	995	35.08	64.92	FpxLm	BC1	DNA	ITS1
FL21_ITS1_cDNA_number of sequences	0	4456	4456	0	100	FpxLm	BC1	cDNA	ITS1
FL21_ITS1_cDNA_number of ribotypes	0	129	129	0	100	FpxLm	BC1	cDNA	ITS1
FL21_ITS1_DNA_number of sequences	4757	12593	17350	27.42	72.58	FpxLm	BC1	DNA	ITS1
FL21_ITS1_DNA_number of ribotypes	359	658	1017	35.3	64.7	FpxLm	BC1	DNA	ITS1
FL22_ITS1_cDNA_number of sequences	1	2433	2434	0.04	99.96	FpxLm	BC1	cDNA	ITS1
FL22_ITS1_cDNA_number of ribotypes	1	134	135	0.74	99.26	FpxLm	BC1	cDNA	ITS1
FL22_ITS1_DNA_number of sequences	4842	9071	13913	34.8	65.2	FpxLm	BC1	DNA	ITS1
FL22_ITS1_DNA_number of ribotypes	348	505	853	40.8	59.2	FpxLm	BC1	DNA	ITS1
FL23_ITS1_cDNA_number of sequences	2	993	995	0.2	99.8	FpxLm	BC1	cDNA	ITS1
FL23_ITS1_cDNA_number of ribotypes	1	130	131	0.76	99.24	FpxLm	BC1	cDNA	ITS1
FL23_ITS1_DNA_number of sequences	4097	10456	14553	28.15	71.85	FpxLm	BC1	DNA	ITS1
FL23_ITS1_DNA_number of ribotypes	332	525	857	38.74	61.26	FpxLm	BC1	DNA	ITS1
FL24_ITS1_cDNA_number of sequences	1	1060	1061	0.09	99.91	FpxLm	BC1	cDNA	ITS1
FL24_ITS1_cDNA_number of ribotypes	1	97	98	1.02	98.98	FpxLm	BC1	cDNA	ITS1
FL24_ITS1_DNA_number of sequences	7298	11938	19236	37.94	62.06	FpxLm	BC1	DNA	ITS1
FL24_ITS1_DNA_number of ribotypes	475	603	1078	44.06	55.94	FpxLm	BC1	DNA	ITS1
FL25_ITS1_cDNA_number of sequences	2	3453	3455	0.06	99.94	FpxLm	BC1	cDNA	ITS1
FL25_ITS1_cDNA_number of ribotypes	2	195	197	1.02	98.98	FpxLm	BC1	cDNA	ITS1
FL25_ITS1_DNA_number of sequences	6271	11668	17939	34.96	65.04	FpxLm	BC1	DNA	ITS1
FL25_ITS1_DNA_number of ribotypes	431	578	1009	42.72	57.28	FpxLm	BC1	DNA	ITS1
cDNA_number of sequences	6	13605	13611
cDNA_average number of sequences	1	2267.5	2268.5	0.065	99.935
cDNA_average number of sequences_st. dev.	0.89	1443.82	1443.65	0.07	0.07
DNA_number of sequences	31395	68351	99746
DNA_average number of sequences	5232.5	11391.8	16624.3	31.32	68.68
DNA_average number of sequences_st. dev.	1813.6	4966.4	6671.52	7.79	7.79
	number of sequences			proportion of sequences (percent)
Lolium multiflorum (4x) x Festuca pratensis (4x)	Festuca-type	Lolium-type	total	Festuca-type	Lolium-type	Cross	Generation	Template	Region
FL11_ITS1_cDNA_number of sequences	6	1272	1278	0.47	99.53	LmxFp	F1	cDNA	ITS1
FL11_ITS1_cDNA_number of ribotypes	3	93	96	3.13	96.88	LmxFp	F1	cDNA	ITS1
FL11_ITS1_DNA_number of sequences	8462	11455	19917	42.49	57.51	LmxFp	F1	DNA	ITS1
FL11_ITS1_DNA_number of ribotypes	461	433	894	51.57	48.43	LmxFp	F1	DNA	ITS1
FL12_ITS1_cDNA_number of sequences	3	1017	1020	0.29	99.71	LmxFp	F1	cDNA	ITS1
FL12_ITS1_cDNA_number of ribotypes	2	34	36	5.56	94.44	LmxFp	F1	cDNA	ITS1
FL12_ITS1_DNA_number of sequences	4235	12892	17127	24.73	75.27	LmxFp	F1	DNA	ITS1
FL12_ITS1_DNA_number of ribotypes	287	627	914	31.4	68.6	LmxFp	F1	DNA	ITS1
cDNA_number of sequences	9	2289	2298
cDNA_average number of sequences	4.5	1144.5	1149	0.38	99.62
cDNA_average number of sequences_st. dev.	2.12	180.31	182.43	0.13	0.13
DNA_number of sequences	12697	24347	37044
DNA_average number of sequences	6348.5	12173.5	18522	33.61	66.39
DNA_average number of sequences_st. dev.	2988.94	1016.11	1972.83	12.56	12.56
	number of sequences			proportion of sequences (percent)
Lolium perenne (2x) x Festuca pratensis (2x)	Festuca-type	Lolium-type	total	Festuca-type	Lolium-type	Cross	Generation	Template	Region
FL13_ITS1_cDNA_number of sequences	1	1452	1453	0.07	99.93	LpxFp	F1	cDNA	ITS1
FL13_ITS1_cDNA_number of ribotypes	1	17	18	5.56	94.44	LpxFp	F1	cDNA	ITS1
FL13_ITS1_DNA_number of sequences	3316	12720	16036	20.68	79.32	LpxFp	F1	DNA	ITS1
FL13_ITS1_DNA_number of ribotypes	209	611	820	25.49	74.51	LpxFp	F1	DNA	ITS1
FL14_ITS1_cDNA_number of sequences	3	1743	1746	0.17	99.83	LpxFp	F1	cDNA	ITS1
FL14_ITS1_cDNA_number of ribotypes	3	39	42	7.14	92.86	LpxFp	F1	cDNA	ITS1
FL14_ITS1_DNA_number of sequences	2223	10244	12467	17.83	82.17	LpxFp	F1	DNA	ITS1
FL14_ITS1_DNA_number of ribotypes	154	567	721	21.36	78.64	LpxFp	F1	DNA	ITS1
FL15_ITS1_cDNA_number of sequences	1	785	786	0.13	99.87	LpxFp	F1	cDNA	ITS1
FL15_ITS1_cDNA_number of ribotypes	1	18	19	5.26	94.74	LpxFp	F1	cDNA	ITS1
FL15_ITS1_DNA_number of sequences	3079	10567	13646	22.56	77.44	LpxFp	F1	DNA	ITS1
FL15_ITS1_DNA_number of ribotypes	177	567	744	23.79	76.21	LpxFp	F1	DNA	ITS1
FL16_ITS1_cDNA_number of sequences	0	1670	1670	0	100	LpxFp	F1	cDNA	ITS1
FL16_ITS1_cDNA_number of ribotypes	0	34	34	0	100	LpxFp	F1	cDNA	ITS1
FL16_ITS1_DNA_number of sequences	4208	13685	17893	23.52	76.48	LpxFp	F1	DNA	ITS1
FL16_ITS1_DNA_number of ribotypes	239	703	942	25.37	74.63	LpxFp	F1	DNA	ITS1
FL17_ITS1_cDNA_number of sequences	2	1040	1042	0.19	99.81	LpxFp	F1	cDNA	ITS1
FL17_ITS1_cDNA_number of ribotypes	2	30	32	6.25	93.75	LpxFp	F1	cDNA	ITS1
FL17_ITS1_DNA_number of sequences	4185	8570	12755	32.81	67.19	LpxFp	F1	DNA	ITS1
FL17_ITS1_DNA_number of ribotypes	221	547	768	28.78	71.22	LpxFp	F1	DNA	ITS1
cDNA_number of sequences	7	6690	6697
cDNA_average number of sequences	1.4	1338	1339.4	0.112	99.888
cDNA_average number of sequences_st. dev.	1.14	412.87	412.98	0.08	0.08
DNA_number of sequences	17011	55786	72797
DNA_average number of sequences	3402.2	11157.2	14559.4	23.48	76.52
DNA_average number of sequences_st. dev.	831.34	2043.77	2332.46	5.65	5.65
	number of sequences			proportion of sequences (percent)
Lolium multiflorum (4x) x Festuca glaucescens (4x)	Festuca-type	Lolium-type	total	Festuca-type	Lolium-type	Cross	Generation	Template	Region
FL27_ITS1_cDNA_number of sequences	6	1002	1008	0.6	99.4	LmxFg	F2	cDNA	ITS1
FL27_ITS1_cDNA_number of ribotypes	2	86	88	2.27	97.73	LmxFg	F2	cDNA	ITS1
FL27_ITS1_DNA_number of sequences	8380	9820	18200	46.04	53.96	LmxFg	F2	DNA	ITS1
FL27_ITS1_DNA_number of ribotypes	300	570	870	34.48	65.52	LmxFg	F2	DNA	ITS1
FL28_ITS1_cDNA_number of sequences	0	3746	3746	0	100	LmxFg	F2	cDNA	ITS1
FL28_ITS1_cDNA_number of ribotypes	0	165	165	0	100	LmxFg	F2	cDNA	ITS1
FL28_ITS1_DNA_number of sequences	8032	12562	20594	39	61	LmxFg	F2	DNA	ITS1
FL28_ITS1_DNA_number of ribotypes	363	680	1043	34.8	65.2	LmxFg	F2	DNA	ITS1
FL29_ITS1_cDNA_number of sequences	4	2173	2177	0.18	99.82	LmxFg	F2	cDNA	ITS1
FL29_ITS1_cDNA_number of ribotypes	1	148	149	0.67	99.33	LmxFg	F2	cDNA	ITS1
FL29_ITS1_DNA_number of sequences	8241	11037	19278	42.75	57.25	LmxFg	F2	DNA	ITS1
FL29_ITS1_DNA_number of ribotypes	275	552	827	33.25	66.75	LmxFg	F2	DNA	ITS1
FL30_ITS1_cDNA_number of sequences	4	1402	1406	0.28	99.72	LmxFg	F2	cDNA	ITS1
FL30_ITS1_cDNA_number of ribotypes	4	76	80	5	95	LmxFg	F2	cDNA	ITS1
FL30_ITS1_DNA_number of sequences	5339	17648	22987	23.23	76.77	LmxFg	F2	DNA	ITS1
FL30_ITS1_DNA_number of ribotypes	361	761	1122	32.17	67.83	LmxFg	F2	DNA	ITS1
FL41_ITS1_cDNA_number of sequences	1	333	334	0.3	99.7	LmxFg	F2	cDNA	ITS1
FL41_ITS1_cDNA_number of ribotypes	1	22	23	4.35	95.65	LmxFg	F2	cDNA	ITS1
FL41_ITS1_DNA_number of sequences	169	1325	1494	11.31	88.69	LmxFg	F2	DNA	ITS1
FL41_ITS1_DNA_number of ribotypes	24	163	187	12.83	87.17	LmxFg	F2	DNA	ITS1
cDNA_number of sequences	15	8656	8671
cDNA_average number of sequences	3	1731.2	1734.2	0.272	99.728
cDNA_average number of sequences_st. dev.	2.45	1308.59	1307.58	0.22	0.22
DNA_number of sequences	30161	52392	82553
DNA_average number of sequences	6032.2	10478.4	16510.6	32.466	67.534
DNA_average number of sequences_st. dev.	3508.84	5921.88	8582.38	14.71	14.71
	number of sequences			proportion of sequences (percent)
Lolium multiflorum (4x)	Festuca-type	Lolium-type	total	Festuca-type	Lolium-type	Cross	Generation	Template	Region
FL37_ITS1_cDNA_number of sequences	1	763	764	0.13	99.87	Lm	P-Lm	cDNA	ITS1
FL37_ITS1_cDNA_number of ribotypes	1	23	24	4.17	95.83	Lm	P-Lm	cDNA	ITS1
FL37_ITS1_DNA_number of sequences	593	9182	9775	6.07	93.93	Lm	P-Lm	DNA	ITS1
FL37_ITS1_DNA_number of ribotypes	64	613	677	9.45	90.55	Lm	P-Lm	DNA	ITS1
FL42_ITS1_cDNA_number of sequences	0	1101	1101	0	100	Lm	P-Lm	cDNA	ITS1
FL42_ITS1_cDNA_number of ribotypes	0	75	75	0	100	Lm	P-Lm	cDNA	ITS1
FL42_ITS1_DNA_number of sequences	1420	15686	17106	8.3	91.7	Lm	P-Lm	DNA	ITS1
FL42_ITS1_DNA_number of ribotypes	123	703	826	14.89	85.11	Lm	P-Lm	DNA	ITS1
FL43_ITS1_cDNA_number of sequences	1	807	808	0.12	99.88	Lm	P-Lm	cDNA	ITS1
FL43_ITS1_cDNA_number of ribotypes	1	40	41	2.44	97.56	Lm	P-Lm	cDNA	ITS1
FL43_ITS1_DNA_number of sequences	1659	12416	14075	11.79	88.21	Lm	P-Lm	DNA	ITS1
FL43_ITS1_DNA_number of ribotypes	112	501	613	18.27	81.73	Lm	P-Lm	DNA	ITS1
cDNA_number of sequences	2	2671	2673
cDNA_average number of sequences	1	890.333	891	0.0833333	99.9167
cDNA_average number of sequences_st. dev.	0.58	183.76	183.19	0.07	0.07
DNA_number of sequences	3672	37284	40956
DNA_average number of sequences	1224	12428	13652	8.72	91.28
DNA_average number of sequences_st. dev.	559.38	3252.02	3683.76	2.88	2.88
	number of sequences			proportion of sequences (percent)
Festuca pratensis (4x)	Festuca-type	Lolium-type	total	Festuca-type	Lolium-type	Cross	Generation	Template	Region
FL34_ITS1_cDNA_number of sequences	896	3	899	99.67	0.33	Fp	P-Fp	cDNA	ITS1
FL34_ITS1_cDNA_number of ribotypes	16	1	17	94.12	5.88	Fp	P-Fp	cDNA	ITS1
FL34_ITS1_DNA_number of sequences	18515	13	18528	99.93	0.07	Fp	P-Fp	DNA	ITS1
FL34_ITS1_DNA_number of ribotypes	447	6	453	98.68	1.32	Fp	P-Fp	DNA	ITS1
FL35_ITS1_cDNA_number of sequences	989	1	990	99.9	0.1	Fp	P-Fp	cDNA	ITS1
FL35_ITS1_cDNA_number of ribotypes	17	1	18	94.44	5.56	Fp	P-Fp	cDNA	ITS1
FL35_ITS1_DNA_number of sequences	18302	9	18311	99.95	0.05	Fp	P-Fp	DNA	ITS1
FL35_ITS1_DNA_number of ribotypes	483	4	487	99.18	0.82	Fp	P-Fp	DNA	ITS1
FL36_ITS1_cDNA_number of sequences	2235	0	2235	100	0	Fp	P-Fp	cDNA	ITS1
FL36_ITS1_cDNA_number of ribotypes	65	0	65	100	0	Fp	P-Fp	cDNA	ITS1
FL36_ITS1_DNA_number of sequences	3344	2	3346	99.94	0.06	Fp	P-Fp	DNA	ITS1
FL36_ITS1_DNA_number of ribotypes	109	2	111	98.2	1.8	Fp	P-Fp	DNA	ITS1
FL39_ITS1_cDNA_number of sequences	1392	0	1392	100	0	Fp	P-Fp	cDNA	ITS1
FL39_ITS1_cDNA_number of ribotypes	36	0	36	100	0	Fp	P-Fp	cDNA	ITS1
FL39_ITS1_DNA_number of sequences	14406	8	14414	99.94	0.06	Fp	P-Fp	DNA	ITS1
FL39_ITS1_DNA_number of ribotypes	465	5	470	98.94	1.06	Fp	P-Fp	DNA	ITS1
cDNA_number of sequences	5512	4	5516
cDNA_average number of sequences	1378	1	1379	99.8925	0.1075
cDNA_average number of sequences_st. dev.	610.54	1.41	609.54	0.16	0.16
DNA_number of sequences	54567	32	54599
DNA_average number of sequences	13641.8	8	13649.8	99.94	0.06
DNA_average number of sequences_st. dev.	7120.26	4.55	7124.51	0.01	0.01
	number of sequences			proportion of sequences (percent)
Festuca pratensis (2x)	Festuca-type	Lolium-type	total	Festuca-type	Lolium-type	Cross	Generation	Template	Region
FL40_ITS1_cDNA_number of sequences	507	1	508	99.8	0.2	Fp	P-Fp	cDNA	ITS1
FL40_ITS1_cDNA_number of ribotypes	41	1	42	97.62	2.38	Fp	P-Fp	cDNA	ITS1
FL40_ITS1_DNA_number of sequences	11710	7	11717	99.94	0.06	Fp	P-Fp	DNA	ITS1
FL40_ITS1_DNA_number of ribotypes	204	2	206	99.03	0.97	Fp	P-Fp	DNA	ITS1
	number of sequences			proportion of sequences (percent)
Lolium perenne (2x)	Festuca-type	Lolium-type	total	Festuca-type	Lolium-type	Cross	Generation	Template	Region
FL38_ITS1_cDNA_number of sequences	0	614	614	0	100	Lp	P-Lp	cDNA	ITS1
FL38_ITS1_cDNA_number of ribotypes	0	9	9	0	100	Lp	P-Lp	cDNA	ITS1
FL38_ITS1_DNA_number of sequences	12	15804	15816	0.08	99.92	Lp	P-Lp	DNA	ITS1
FL38_ITS1_DNA_number of ribotypes	4	634	638	0.63	99.37	Lp	P-Lp	DNA	ITS1
	number of sequences			proportion of sequences (percent)
Festuca glaucescens (4x)	Festuca-type	Lolium-type	total	Festuca-type	Lolium-type	Cross	Generation	Template	Region
FL31_ITS1_cDNA_number of sequences	3415	0	3415	100	0	Fg	P-Fg	cDNA	ITS1
FL31_ITS1_cDNA_number of ribotypes	130	0	130	100	0	Fg	P-Fg	cDNA	ITS1
FL31_ITS1_DNA_number of sequences	24602	12	24614	99.95	0.05	Fg	P-Fg	DNA	ITS1
FL31_ITS1_DNA_number of ribotypes	458	5	463	98.92	1.08	Fg	P-Fg	DNA	ITS1
FL32_ITS1_cDNA_number of sequences	2502	1	2503	99.96	0.04	Fg	P-Fg	cDNA	ITS1
FL32_ITS1_cDNA_number of ribotypes	127	1	128	99.22	0.78	Fg	P-Fg	cDNA	ITS1
FL32_ITS1_DNA_number of sequences	16109	6	16115	99.96	0.04	Fg	P-Fg	DNA	ITS1
FL32_ITS1_DNA_number of ribotypes	253	1	254	99.61	0.39	Fg	P-Fg	DNA	ITS1
FL33_ITS1_cDNA_number of sequences	4941	0	4941	100	0	Fg	P-Fg	cDNA	ITS1
FL33_ITS1_cDNA_number of ribotypes	119	0	119	100	0	Fg	P-Fg	cDNA	ITS1
FL33_ITS1_DNA_number of sequences	16830	12	16842	99.93	0.07	Fg	P-Fg	DNA	ITS1
FL33_ITS1_DNA_number of ribotypes	298	3	301	99	1	Fg	P-Fg	DNA	ITS1
cDNA_number of sequences	10858	1	10859
cDNA_average number of sequences	3619.33	0.333333	3619.67	99.9867	0.0133333
cDNA_average number of sequences_st. dev.	1232.27	0.58	1231.82	0.02	0.02
DNA_number of sequences	57541	30	57571
DNA_average number of sequences	19180.3	10	19190.3	99.9467	0.0533333
DNA_average number of sequences_st. dev.	4709.12	3.46	4711.08	0.02	0.02
	number of sequences					proportion of sequences (percent)
Festuca glaucescens (4x) x Festuca pratensis (4x)	F. glaucescens-type	F. pratensis-type	Festuca-type (FG + FP)	Lolium-type	total	F. glaucescens-type	F. pratensis-type	Lolium-type	Cross	Generation	Template	Region
FL1_ITS1_cDNA_number of sequences	25	1890	1915	1	1916	1.3	98.64	0.05	FgxFp	F1	cDNA	ITS1
FL1_ITS1_cDNA_number of ribotypes	4	57	61	1	62	6.45	91.94	1.61	FgxFp	F1	cDNA	ITS1
FL1_ITS1_DNA_number of sequences	4303	12619	16922	3	16925	25.42	74.56	0.02	FgxFp	F1	DNA	ITS1
FL1_ITS1_DNA_number of ribotypes	259	399	658	3	661	39.18	60.36	0.45	FgxFp	F1	DNA	ITS1
FL2_ITS1_cDNA_number of sequences	1	1010	1011	0	1011	0.1	99.9	0	FgxFp	F1	cDNA	ITS1
FL2_ITS1_cDNA_number of ribotypes	1	25	26	0	26	3.85	96.15	0	FgxFp	F1	cDNA	ITS1
FL2_ITS1_DNA_number of sequences	4890	12051	16941	6	16947	28.85	71.11	0.04	FgxFp	F1	DNA	ITS1
FL2_ITS1_DNA_number of ribotypes	294	375	669	2	671	43.82	55.89	0.3	FgxFp	F1	DNA	ITS1
FL3_ITS1_cDNA_number of sequences	2	1257	1259	0	1259	0.16	99.84	0	FgxFp	F1	cDNA	ITS1
FL3_ITS1_cDNA_number of ribotypes	1	29	30	0	30	3.33	96.67	0	FgxFp	F1	cDNA	ITS1
FL3_ITS1_DNA_number of sequences	5871	11786	17657	7	17664	33.24	66.72	0.04	FgxFp	F1	DNA	ITS1
FL3_ITS1_DNA_number of ribotypes	310	322	632	1	633	48.97	50.87	0.16	FgxFp	F1	DNA	ITS1
FL4_ITS1_cDNA_number of sequences	672	1272	1944	0	1944	34.57	65.43	0	FgxFp	F1	cDNA	ITS1
FL4_ITS1_cDNA_number of ribotypes	65	35	100	0	100	65	35	0	FgxFp	F1	cDNA	ITS1
FL4_ITS1_DNA_number of sequences	5916	13904	19820	2	19822	29.85	70.14	0.01	FgxFp	F1	DNA	ITS1
FL4_ITS1_DNA_number of ribotypes	333	391	724	2	726	45.87	53.86	0.28	FgxFp	F1	DNA	ITS1
FL5_ITS1_cDNA_number of sequences	1	1022	1023	0	1023	0.1	99.9	0	FgxFp	F1	cDNA	ITS1
FL5_ITS1_cDNA_number of ribotypes	1	24	25	0	25	4	96	0	FgxFp	F1	cDNA	ITS1
FL5_ITS1_DNA_number of sequences	5741	12882	18623	2	18625	30.82	69.17	0.01	FgxFp	F1	DNA	ITS1
FL5_ITS1_DNA_number of ribotypes	322	371	693	2	695	46.33	53.38	0.29	FgxFp	F1	DNA	ITS1
cDNA_number of sequences	701	6451	7152	1	7153
cDNA_average number of sequences	140.2	1290.2	1430.4	0.2	1430.6	7.246	92.742	0.01
cDNA_average number of sequences_st. dev.	297.46	357.64	466.33	0.45	466.59	15.28	15.28	0.02
DNA_number of sequences	26721	63242	89963	20	89983
DNA_average number of sequences	5344.2	12648.4	17992.6	4	17996.6	29.636	70.34	0.024
DNA_average number of sequences_st. dev.	716.3	826.53	1235.06	2.35	1233.65	2.86	2.87	0.02
						proportion of sequences (percent)
Festuca glaucescens (4x)	F. glaucescens-type	F. pratensis-type	Festuca-type (FG + FP)	Lolium-type	total	F. glaucescens-type	F. pratensis-type	Lolium-type	Cross	Generation	Template	Region
FL31_ITS1_cDNA_number of sequences	3415	0	3415	0	3415	100	0	0	Fg	P-Fg	cDNA	ITS1
FL31_ITS1_cDNA_number of ribotypes	130	0	130	0	130	100	0	0	Fg	P-Fg	cDNA	ITS1
FL31_ITS1_DNA_number of sequences	24570	32	24602	12	24614	99.82	0.13	0.05	Fg	P-Fg	DNA	ITS1
FL31_ITS1_DNA_number of ribotypes	454	4	458	5	463	98.06	0.86	1.08	Fg	P-Fg	DNA	ITS1
FL32_ITS1_cDNA_number of sequences	2502	0	2502	1	2503	99.96	0	0.04	Fg	P-Fg	cDNA	ITS1
FL32_ITS1_cDNA_number of ribotypes	127	0	127	1	128	99.22	0	0.78	Fg	P-Fg	cDNA	ITS1
FL32_ITS1_DNA_number of sequences	16104	5	16109	6	16115	99.93	0.03	0.04	Fg	P-Fg	DNA	ITS1
FL32_ITS1_DNA_number of ribotypes	251	2	253	1	254	98.82	0.79	0.39	Fg	P-Fg	DNA	ITS1
FL33_ITS1_cDNA_number of sequences	4941	0	4941	0	4941	100	0	0	Fg	P-Fg	cDNA	ITS1
FL33_ITS1_cDNA_number of ribotypes	119	0	119	0	119	100	0	0	Fg	P-Fg	cDNA	ITS1
FL33_ITS1_DNA_number of sequences	16828	2	16830	12	16842	99.92	0.01	0.07	Fg	P-Fg	DNA	ITS1
FL33_ITS1_DNA_number of ribotypes	296	2	298	3	301	98.34	0.66	1	Fg	P-Fg	DNA	ITS1
cDNA_number of sequences	10858	0	10858	1	10859
cDNA_average number of sequences	3619.33	0	3619.33	0.333333	3619.67	99.9867	0	0.0133333
cDNA_average number of sequences_st. dev.	1232.27	0	1232.27	0.58	1231.82	0.02	0	0.02
DNA_number of sequences	57502	39	57541	30	57571
DNA_average number of sequences	19167.3	13	19180.3	10	19190.3	99.89	0.0566667	0.0533333
DNA_average number of sequences_st. dev.	4692.83	16.52	4709.12	3.46	4711.08	0.06	0.06	0.02
						proportion of sequences (percent)
Festuca pratensis (4x)	F. glaucescens-type	F. pratensis-type	Festuca-type (FG + FP)	Lolium-type	total	F. glaucescens-type	F. pratensis-type	Lolium-type	Cross	Generation	Template	Region
FL34_ITS1_cDNA_number of sequences	0	896	896	3	899	0	99.67	0.33	Fp	P-Fp	cDNA	ITS1
FL34_ITS1_cDNA_number of ribotypes	0	16	16	1	17	0	94.12	5.88	Fp	P-Fp	cDNA	ITS1
FL34_ITS1_DNA_number of sequences	0	18515	18515	13	18528	0	99.93	0.07	Fp	P-Fp	DNA	ITS1
FL34_ITS1_DNA_number of ribotypes	0	447	447	6	453	0	98.68	1.32	Fp	P-Fp	DNA	ITS1
FL35_ITS1_cDNA_number of sequences	0	989	989	1	990	0	99.9	0.1	Fp	P-Fp	cDNA	ITS1
FL35_ITS1_cDNA_number of ribotypes	0	17	17	1	18	0	94.44	5.56	Fp	P-Fp	cDNA	ITS1
FL35_ITS1_DNA_number of sequences	3	18299	18302	9	18311	0.02	99.93	0.05	Fp	P-Fp	DNA	ITS1
FL35_ITS1_DNA_number of ribotypes	1	482	483	4	487	0.21	98.97	0.82	Fp	P-Fp	DNA	ITS1
FL36_ITS1_cDNA_number of sequences	0	2235	2235	0	2235	0	100	0	Fp	P-Fp	cDNA	ITS1
FL36_ITS1_cDNA_number of ribotypes	0	65	65	0	65	0	100	0	Fp	P-Fp	cDNA	ITS1
FL36_ITS1_DNA_number of sequences	0	3344	3344	2	3346	0	99.94	0.06	Fp	P-Fp	DNA	ITS1
FL36_ITS1_DNA_number of ribotypes	0	109	109	2	111	0	98.2	1.8	Fp	P-Fp	DNA	ITS1
FL39_ITS1_cDNA_number of sequences	1	1391	1392	0	1392	0.07	99.93	0	Fp	P-Fp	cDNA	ITS1
FL39_ITS1_cDNA_number of ribotypes	1	35	36	0	36	2.78	97.22	0	Fp	P-Fp	cDNA	ITS1
FL39_ITS1_DNA_number of sequences	1	14405	14406	8	14414	0.01	99.94	0.06	Fp	P-Fp	DNA	ITS1
FL39_ITS1_DNA_number of ribotypes	1	464	465	5	470	0.21	98.72	1.06	Fp	P-Fp	DNA	ITS1
FL40_ITS1_cDNA_number of sequences	0	507	507	1	508	0	99.8	0.2	Fp	P-Fp	cDNA	ITS1
FL40_ITS1_cDNA_number of ribotypes	0	41	41	1	42	0	97.62	2.38	Fp	P-Fp	cDNA	ITS1
FL40_ITS1_DNA_number of sequences	0	11710	11710	7	11717	0	99.94	0.06	Fp	P-Fp	DNA	ITS1
FL40_ITS1_DNA_number of ribotypes	0	204	204	2	206	0	99.03	0.97	Fp	P-Fp	DNA	ITS1
cDNA_number of sequences	1	6018	6019	5	6024
cDNA_average number of sequences	0.2	1203.6	1203.8	1	1204.8	0.014	99.86	0.126
cDNA_average number of sequences_st. dev.	0.45	656.66	656.73	1.22	656.04	0.03	0.13	0.14
DNA_number of sequences	4	66273	66277	39	66316
DNA_average number of sequences	0.8	13254.6	13255.4	7.8	13263.2	0.006	99.936	0.06
DNA_average number of sequences_st. dev.	1.3	6225.89	6226.55	3.96	6230.26	0.01	0.01	0.01

## Sheet: ITS2_dataset
hybrid combination/sample
	number of sequences			proportion of sequences (%)
Festuca pratensis (4x) x Lolium multiflorum (4x)	Festuca-type	Lolium-type	total	Festuca-type	Lolium-type	Cross	Generation	Template	Region
FL6_ITS2_cDNA_number of sequences	1	25339	25340	0	100	FpxLm	F1	cDNA	ITS2
FL6_ITS2_cDNA_number of ribotypes	1	808	809	0.12	99.88	FpxLm	F1	cDNA	ITS2
FL6_ITS2_DNA_number of sequences	2	31084	31086	0.01	99.99	FpxLm	F1	DNA	ITS2
FL6_ITS2_DNA_number of ribotypes	2	1673	1675	0.12	99.88	FpxLm	F1	DNA	ITS2
FL7_ITS2_cDNA_number of sequences	4	22470	22474	0.02	99.98	FpxLm	F1	cDNA	ITS2
FL7_ITS2_cDNA_number of ribotypes	2	1028	1030	0.19	99.81	FpxLm	F1	cDNA	ITS2
FL7_ITS2_DNA_number of sequences	74	18421	18495	0.4	99.6	FpxLm	F1	DNA	ITS2
FL7_ITS2_DNA_number of ribotypes	10	1300	1310	0.76	99.24	FpxLm	F1	DNA	ITS2
FL8_ITS2_cDNA_number of sequences	10	22831	22841	0.04	99.96	FpxLm	F1	cDNA	ITS2
FL8_ITS2_cDNA_number of ribotypes	2	1661	1663	0.12	99.88	FpxLm	F1	cDNA	ITS2
FL8_ITS2_DNA_number of sequences	24	7486	7510	0.32	99.68	FpxLm	F1	DNA	ITS2
FL8_ITS2_DNA_number of ribotypes	4	508	512	0.78	99.22	FpxLm	F1	DNA	ITS2
FL9_ITS2_cDNA_number of sequences	4	24359	24363	0.02	99.98	FpxLm	F1	cDNA	ITS2
FL9_ITS2_cDNA_number of ribotypes	2	1007	1009	0.2	99.8	FpxLm	F1	cDNA	ITS2
FL9_ITS2_DNA_number of sequences	648	24613	25261	2.57	97.43	FpxLm	F1	DNA	ITS2
FL9_ITS2_DNA_number of ribotypes	51	1536	1587	3.21	96.79	FpxLm	F1	DNA	ITS2
FL10_ITS2_cDNA_number of sequences	3	8884	8887	0.03	99.97	FpxLm	F1	cDNA	ITS2
FL10_ITS2_cDNA_number of ribotypes	3	503	506	0.59	99.41	FpxLm	F1	cDNA	ITS2
FL10_ITS2_DNA_number of sequences	1054	30923	31977	3.3	96.7	FpxLm	F1	DNA	ITS2
FL10_ITS2_DNA_number of ribotypes	102	2008	2110	4.83	95.17	FpxLm	F1	DNA	ITS2
cDNA_number of sequences	22	103883	103905
cDNA_average number of sequences	4.4	20776.6	20781	0.022	99.978
cDNA_average number of sequences_st. dev.	3.36	6748.54	6748.93	0.01	0.01
DNA_number of sequences	1802	112527	114329
DNA_average number of sequences	360.4	22505.4	22865.8	1.32	98.68
DNA_average number of sequences_st. dev.	471.02	9888.82	10139.4	1.5	1.5
FL18_ITS2_cDNA_number of sequences	11	34383	34394	0.03	99.97	FpxLm	F2	cDNA	ITS2
FL18_ITS2_cDNA_number of ribotypes	1	3622	3623	0.03	99.97	FpxLm	F2	cDNA	ITS2
FL18_ITS2_DNA_number of sequences	542	36330	36872	1.47	98.53	FpxLm	F2	DNA	ITS2
FL18_ITS2_DNA_number of ribotypes	45	1516	1561	2.88	97.12	FpxLm	F2	DNA	ITS2
FL19_ITS2_cDNA_number of sequences	1	8887	8888	0.01	99.99	FpxLm	F2	cDNA	ITS2
FL19_ITS2_cDNA_number of ribotypes	1	1486	1487	0.07	99.93	FpxLm	F2	cDNA	ITS2
FL19_ITS2_DNA_number of sequences	910	11112	12022	7.57	92.43	FpxLm	F2	DNA	ITS2
FL19_ITS2_DNA_number of ribotypes	61	979	1040	5.87	94.13	FpxLm	F2	DNA	ITS2
cDNA_number of sequences	12	43270	43282
cDNA_average number of sequences	6	21635	21641	0.02	99.98
cDNA_average number of sequences_st. dev.	7.07	18028.4	18035.5	0.01	0.01
DNA_number of sequences	1452	47442	48894
DNA_average number of sequences	726	23721	24447	4.52	95.48
DNA_average number of sequences_st. dev.	260.22	17831.8	17571.6	4.31	4.31
FL26_ITS2_cDNA_number of sequences	7	21654	21661	0.03	99.97	FpxLm	F3	cDNA	ITS2
FL26_ITS2_cDNA_number of ribotypes	1	676	677	0.15	99.85	FpxLm	F3	cDNA	ITS2
FL26_ITS2_DNA_number of sequences	479	5939	6418	7.46	92.54	FpxLm	F3	DNA	ITS2
FL26_ITS2_DNA_number of ribotypes	41	535	576	7.12	92.88	FpxLm	F3	DNA	ITS2
FL20_ITS2_cDNA_number of sequences	2	23253	23255	0.01	99.99	FpxLm	BC1	cDNA	ITS2
FL20_ITS2_cDNA_number of ribotypes	2	1092	1094	0.18	99.82	FpxLm	BC1	cDNA	ITS2
FL20_ITS2_DNA_number of sequences	1670	27637	29307	5.7	94.3	FpxLm	BC1	DNA	ITS2
FL20_ITS2_DNA_number of ribotypes	107	1452	1559	6.86	93.14	FpxLm	BC1	DNA	ITS2
FL21_ITS2_cDNA_number of sequences	3	21224	21227	0.01	99.99	FpxLm	BC1	cDNA	ITS2
FL21_ITS2_cDNA_number of ribotypes	1	2801	2802	0.04	99.96	FpxLm	BC1	cDNA	ITS2
FL21_ITS2_DNA_number of sequences	4140	27974	32114	12.89	87.11	FpxLm	BC1	DNA	ITS2
FL21_ITS2_DNA_number of ribotypes	202	1588	1790	11.28	88.72	FpxLm	BC1	DNA	ITS2
FL22_ITS2_cDNA_number of sequences	3	27246	27249	0.01	99.99	FpxLm	BC1	cDNA	ITS2
FL22_ITS2_cDNA_number of ribotypes	3	3035	3038	0.1	99.9	FpxLm	BC1	cDNA	ITS2
FL22_ITS2_DNA_number of sequences	1231	41040	42271	2.91	97.09	FpxLm	BC1	DNA	ITS2
FL22_ITS2_DNA_number of ribotypes	121	1832	1953	6.2	93.8	FpxLm	BC1	DNA	ITS2
FL23_ITS2_cDNA_number of sequences	4	23199	23203	0.02	99.98	FpxLm	BC1	cDNA	ITS2
FL23_ITS2_cDNA_number of ribotypes	3	2320	2323	0.13	99.87	FpxLm	BC1	cDNA	ITS2
FL23_ITS2_DNA_number of sequences	490	22874	23364	2.1	97.9	FpxLm	BC1	DNA	ITS2
FL23_ITS2_DNA_number of ribotypes	42	1253	1295	3.24	96.76	FpxLm	BC1	DNA	ITS2
FL24_ITS2_cDNA_number of sequences	4	29258	29262	0.01	99.99	FpxLm	BC1	cDNA	ITS2
FL24_ITS2_cDNA_number of ribotypes	2	2501	2503	0.08	99.92	FpxLm	BC1	cDNA	ITS2
FL24_ITS2_DNA_number of sequences	0	109	109	0	100	FpxLm	BC1	DNA	ITS2
FL24_ITS2_DNA_number of ribotypes	0	40	40	0	100	FpxLm	BC1	DNA	ITS2
FL25_ITS2_cDNA_number of sequences	2	13103	13105	0.02	99.98	FpxLm	BC1	cDNA	ITS2
FL25_ITS2_cDNA_number of ribotypes	2	687	689	0.29	99.71	FpxLm	BC1	cDNA	ITS2
FL25_ITS2_DNA_number of sequences	36	1712	1748	2.06	97.94	FpxLm	BC1	DNA	ITS2
FL25_ITS2_DNA_number of ribotypes	3	174	177	1.69	98.31	FpxLm	BC1	DNA	ITS2
cDNA_number of sequences	18	137283	137301
cDNA_average number of sequences	3	22880.5	22883.5	0.0133333	99.9867
cDNA_average number of sequences_st. dev.	0.89	5626.97	5627.54	0.01	0.01
DNA_number of sequences	7567	121346	128913
DNA_average number of sequences	1261.17	20224.3	21485.5	4.27667	95.7233
DNA_average number of sequences_st. dev.	1607.85	14955.7	15750	5	5
	number of sequences			proportion of sequences (%)
Lolium multiflorum (4x) x Festuca pratensis (4x)	Festuca-type	Lolium-type	total	Festuca-type	Lolium-type	Cross	Generation	Template	Region
FL11_ITS2_cDNA_number of sequences	78	26052	26130	0.3	99.7	LmxFp	F1	cDNA	ITS2
FL11_ITS2_cDNA_number of ribotypes	12	1377	1389	0.86	99.14	LmxFp	F1	cDNA	ITS2
FL11_ITS2_DNA_number of sequences	5018	25872	30890	16.24	83.76	LmxFp	F1	DNA	ITS2
FL11_ITS2_DNA_number of ribotypes	259	1280	1539	16.83	83.17	LmxFp	F1	DNA	ITS2
FL12_ITS2_cDNA_number of sequences	12	32743	32755	0.04	99.96	LmxFp	F1	cDNA	ITS2
FL12_ITS2_cDNA_number of ribotypes	6	1049	1055	0.57	99.43	LmxFp	F1	cDNA	ITS2
FL12_ITS2_DNA_number of sequences	2390	31333	33723	7.09	92.91	LmxFp	F1	DNA	ITS2
FL12_ITS2_DNA_number of ribotypes	113	1590	1703	6.64	93.36	LmxFp	F1	DNA	ITS2
cDNA_number of sequences	90	58795	58885
cDNA_average number of sequences	45	29397.5	29442.5	0.17	99.83
cDNA_average number of sequences_st. dev.	46.67	4731.25	4684.58	0.18	0.18
DNA_number of sequences	7408	57205	64613
DNA_average number of sequences	3704	28602.5	32306.5	11.665	88.335
DNA_average number of sequences_st. dev.	1858.28	3861.51	2003.23	6.47	6.47
	number of sequences			proportion of sequences (%)
Lolium perenne (2x) x Festuca pratensis (2x)	Festuca-type	Lolium-type	total	Festuca-type	Lolium-type	Cross	Generation	Template	Region
FL13_ITS2_cDNA_number of sequences	2	23301	23303	0.01	99.99	LpxFp	F1	cDNA	ITS2
FL13_ITS2_cDNA_number of ribotypes	2	992	994	0.2	99.8	LpxFp	F1	cDNA	ITS2
FL13_ITS2_DNA_number of sequences	175	534	709	24.68	75.32	LpxFp	F1	DNA	ITS2
FL13_ITS2_DNA_number of ribotypes	6	106	112	5.36	94.64	LpxFp	F1	DNA	ITS2
FL14_ITS2_cDNA_number of sequences	0	27579	27579	0	100	LpxFp	F1	cDNA	ITS2
FL14_ITS2_cDNA_number of ribotypes	0	1326	1326	0	100	LpxFp	F1	cDNA	ITS2
FL14_ITS2_DNA_number of sequences	1375	35543	36918	3.72	96.28	LpxFp	F1	DNA	ITS2
FL14_ITS2_DNA_number of ribotypes	74	1698	1772	4.18	95.82	LpxFp	F1	DNA	ITS2
FL15_ITS2_cDNA_number of sequences	5	31896	31901	0.02	99.98	LpxFp	F1	cDNA	ITS2
FL15_ITS2_cDNA_number of ribotypes	2	3129	3131	0.06	99.94	LpxFp	F1	cDNA	ITS2
FL15_ITS2_DNA_number of sequences	219	34040	34259	0.64	99.36	LpxFp	F1	DNA	ITS2
FL15_ITS2_DNA_number of ribotypes	22	1642	1664	1.32	98.68	LpxFp	F1	DNA	ITS2
FL16_ITS2_cDNA_number of sequences	3	24761	24764	0.01	99.99	LpxFp	F1	cDNA	ITS2
FL16_ITS2_cDNA_number of ribotypes	3	2487	2490	0.12	99.88	LpxFp	F1	cDNA	ITS2
FL16_ITS2_DNA_number of sequences	1	1249	1250	0.08	99.92	LpxFp	F1	DNA	ITS2
FL16_ITS2_DNA_number of ribotypes	1	222	223	0.45	99.55	LpxFp	F1	DNA	ITS2
FL17_ITS2_cDNA_number of sequences	2	24635	24637	0.01	99.99	LpxFp	F1	cDNA	ITS2
FL17_ITS2_cDNA_number of ribotypes	2	2610	2612	0.08	99.92	LpxFp	F1	cDNA	ITS2
FL17_ITS2_DNA_number of sequences	52	16181	16233	0.32	99.68	LpxFp	F1	DNA	ITS2
FL17_ITS2_DNA_number of ribotypes	7	1033	1040	0.67	99.33	LpxFp	F1	DNA	ITS2
cDNA_number of sequences	12	132172	132184
cDNA_average number of sequences	2.4	26434.4	26436.8	0.01	99.99
cDNA_average number of sequences_st. dev.	1.82	3427.66	3428.57	0.01	0.01
DNA_number of sequences	1822	87547	89369
DNA_average number of sequences	364.4	17509.4	17873.8	5.888	94.112
DNA_average number of sequences_st. dev.	571.83	16976.5	17355.3	10.61	10.61
	number of sequences			proportion of sequences (%)
Lolium multiflorum (4x) x Festuca glaucescens (4x)	Festuca-type	Lolium-type	total	Festuca-type	Lolium-type	Cross	Generation	Template	Region
FL27_ITS2_cDNA_number of sequences	4	20444	20448	0.02	99.98	LmxFg	F2	cDNA	ITS2
FL27_ITS2_cDNA_number of ribotypes	4	650	654	0.61	99.39	LmxFg	F2	cDNA	ITS2
FL27_ITS2_DNA_number of sequences	1059	9431	10490	10.1	89.9	LmxFg	F2	DNA	ITS2
FL27_ITS2_DNA_number of ribotypes	99	653	752	13.16	86.84	LmxFg	F2	DNA	ITS2
FL28_ITS2_cDNA_number of sequences	1	18906	18907	0.01	99.99	LmxFg	F2	cDNA	ITS2
FL28_ITS2_cDNA_number of ribotypes	1	680	681	0.15	99.85	LmxFg	F2	cDNA	ITS2
FL28_ITS2_DNA_number of sequences	2082	16457	18539	11.23	88.77	LmxFg	F2	DNA	ITS2
FL28_ITS2_DNA_number of ribotypes	125	813	938	13.33	86.67	LmxFg	F2	DNA	ITS2
FL29_ITS2_cDNA_number of sequences	3	20758	20761	0.01	99.99	LmxFg	F2	cDNA	ITS2
FL29_ITS2_cDNA_number of ribotypes	3	670	673	0.45	99.55	LmxFg	F2	cDNA	ITS2
FL29_ITS2_DNA_number of sequences	2085	20455	22540	9.25	90.75	LmxFg	F2	DNA	ITS2
FL29_ITS2_DNA_number of ribotypes	20	1189	1209	1.65	98.35	LmxFg	F2	DNA	ITS2
FL30_ITS2_cDNA_number of sequences	0	25164	25164	0	100	LmxFg	F2	cDNA	ITS2
FL30_ITS2_cDNA_number of ribotypes	0	3189	3189	0	100	LmxFg	F2	cDNA	ITS2
FL30_ITS2_DNA_number of sequences	468	23108	23576	1.99	98.01	LmxFg	F2	DNA	ITS2
FL30_ITS2_DNA_number of ribotypes	51	1268	1319	3.87	96.13	LmxFg	F2	DNA	ITS2
FL41_ITS2_cDNA_number of sequences	5	21560	21565	0.02	99.98	LmxFg	F2	cDNA	ITS2
FL41_ITS2_cDNA_number of ribotypes	5	322	327	1.53	98.47	LmxFg	F2	cDNA	ITS2
FL41_ITS2_DNA_number of sequences	1434	10190	11624	12.34	87.66	LmxFg	F2	DNA	ITS2
FL41_ITS2_DNA_number of ribotypes	204	1922	2126	9.6	90.4	LmxFg	F2	DNA	ITS2
cDNA_number of sequences	13	106832	106845
cDNA_average number of sequences	2.6	21366.4	21369	0.012	99.988
cDNA_average number of sequences_st. dev.	2.07	2330.98	2330.22	0.01	0.01
DNA_number of sequences	7128	79641	86769
DNA_average number of sequences	1425.6	15928.2	17353.8	8.982	91.018
DNA_average number of sequences_st. dev.	692.3	6071.69	6061.34	4.08	4.08
	number of sequences			proportion of sequences (%)
Lolium multiflorum (4x)	Festuca-type	Lolium-type	total	Festuca-type	Lolium-type	Cross	Generation	Template	Region
FL37_ITS2_cDNA_number of sequences	4	19286	19290	0.02	99.98	Lm	P-Lm	cDNA	ITS2
FL37_ITS2_cDNA_number of ribotypes	3	367	370	0.81	99.19	Lm	P-Lm	cDNA	ITS2
FL37_ITS2_DNA_number of sequences	0	4829	4829	0	100	Lm	P-Lm	DNA	ITS2
FL37_ITS2_DNA_number of ribotypes	0	485	485	0	100	Lm	P-Lm	DNA	ITS2
FL42_ITS2_cDNA_number of sequences	1	20178	20179	0	100	Lm	P-Lm	cDNA	ITS2
FL42_ITS2_cDNA_number of ribotypes	1	348	349	0.29	99.71	Lm	P-Lm	cDNA	ITS2
FL42_ITS2_DNA_number of sequences	3	18299	18302	0.02	99.98	Lm	P-Lm	DNA	ITS2
FL42_ITS2_DNA_number of ribotypes	3	1350	1353	0.22	99.78	Lm	P-Lm	DNA	ITS2
FL43_ITS2_cDNA_number of sequences	3	22359	22362	0.01	99.99	Lm	P-Lm	cDNA	ITS2
FL43_ITS2_cDNA_number of ribotypes	2	329	331	0.6	99.4	Lm	P-Lm	cDNA	ITS2
FL43_ITS2_DNA_number of sequences	5	32075	32080	0.02	99.98	Lm	P-Lm	DNA	ITS2
FL43_ITS2_DNA_number of ribotypes	5	1479	1484	0.34	99.66	Lm	P-Lm	DNA	ITS2
cDNA_number of sequences	8	61823	61831
cDNA_average number of sequences	2.66667	20607.7	20610.3	0.01	99.99
cDNA_average number of sequences_st. dev.	1.53	1580.92	1580.77	0.01	0.01
DNA_number of sequences	8	55203	55211
DNA_average number of sequences	2.66667	18401	18403.7	0.0133333	99.9867
DNA_average number of sequences_st. dev.	2.52	13623.3	13625.8	0.01	0.01
	number of sequences			proportion of sequences (%)
Festuca pratensis (4x)	Festuca-type	Lolium-type	total	Festuca-type	Lolium-type	Cross	Generation	Template	Region
FL34_ITS2_cDNA_number of sequences	17847	14	17861	99.92	0.08	Fp	P-Fp	cDNA	ITS2
FL34_ITS2_cDNA_number of ribotypes	140	6	146	95.89	4.11	Fp	P-Fp	cDNA	ITS2
FL34_ITS2_DNA_number of sequences	366	4	370	98.92	1.08	Fp	P-Fp	DNA	ITS2
FL34_ITS2_DNA_number of ribotypes	39	3	42	92.86	7.14	Fp	P-Fp	DNA	ITS2
FL35_ITS2_cDNA_number of sequences	9387	0	9387	100	0	Fp	P-Fp	cDNA	ITS2
FL35_ITS2_cDNA_number of ribotypes	77	0	77	100	0	Fp	P-Fp	cDNA	ITS2
FL35_ITS2_DNA_number of sequences	4393	28	4421	99.37	0.63	Fp	P-Fp	DNA	ITS2
FL35_ITS2_DNA_number of ribotypes	273	5	278	98.2	1.8	Fp	P-Fp	DNA	ITS2
FL36_ITS2_cDNA_number of sequences	31851	10	31861	99.97	0.03	Fp	P-Fp	cDNA	ITS2
FL36_ITS2_cDNA_number of ribotypes	327	4	331	98.79	1.21	Fp	P-Fp	cDNA	ITS2
FL36_ITS2_DNA_number of sequences	19149	166	19315	99.14	0.86	Fp	P-Fp	DNA	ITS2
FL36_ITS2_DNA_number of ribotypes	711	37	748	95.05	4.95	Fp	P-Fp	DNA	ITS2
FL39_ITS2_cDNA_number of sequences	24630	19	24649	99.92	0.08	Fp	P-Fp	cDNA	ITS2
FL39_ITS2_cDNA_number of ribotypes	714	6	720	99.17	0.83	Fp	P-Fp	cDNA	ITS2
FL39_ITS2_DNA_number of sequences	406	68	474	85.65	14.35	Fp	P-Fp	DNA	ITS2
FL39_ITS2_DNA_number of ribotypes	59	5	64	92.19	7.81	Fp	P-Fp	DNA	ITS2
cDNA_number of sequences	83715	43	83758
cDNA_average number of sequences	20928.8	10.75	20939.5	99.9525	0.0475
cDNA_average number of sequences_st. dev.	9586.52	8.06	9591.26	0.04	0.04
DNA_number of sequences	24314	266	24580
DNA_average number of sequences	6078.5	66.5	6145	95.77	4.23
DNA_average number of sequences_st. dev.	8916.07	71.39	8980.2	6.75	6.75
	number of sequences			proportion of sequences (%)
Festuca pratensis (2x)	Festuca-type	Lolium-type	total	Festuca-type	Lolium-type	Cross	Generation	Template	Region
FL40_ITS2_cDNA_number of sequences	18406	7	18413	99.96	0.04	Fp	P-Fp	cDNA	ITS2
FL40_ITS2_cDNA_number of ribotypes	164	3	167	98.2	1.8	Fp	P-Fp	cDNA	ITS2
FL40_ITS2_DNA_number of sequences	5	0	5	100	0	Fp	P-Fp	DNA	ITS2
FL40_ITS2_DNA_number of ribotypes	1	0	1	100	0	Fp	P-Fp	DNA	ITS2
	number of sequences			proportion of sequences (%)
Lolium perenne (2x)	Festuca-type	Lolium-type	total	Festuca-type	Lolium-type	Cross	Generation	Template	Region
FL38_ITS2_cDNA_number of sequences	3	18485	18488	0.02	99.98	Lp	P-Lp	cDNA	ITS2
FL38_ITS2_cDNA_number of ribotypes	3	342	345	0.87	99.13	Lp	P-Lp	cDNA	ITS2
FL38_ITS2_DNA_number of sequences	0	4434	4434	0	100	Lp	P-Lp	DNA	ITS2
FL38_ITS2_DNA_number of ribotypes	0	438	438	0	100	Lp	P-Lp	DNA	ITS2
	number of sequences			proportion of sequences (%)
Festuca glaucescens (4x)	Festuca-type	Lolium-type	total	Festuca-type	Lolium-type	Cross	Generation	Template	Region
FL31_ITS2_cDNA_number of sequences	31603	5	31608	99.98	0.02	Fg	P-Fg	cDNA	ITS2
FL31_ITS2_cDNA_number of ribotypes	1536	5	1541	99.68	0.32	Fg	P-Fg	cDNA	ITS2
FL31_ITS2_DNA_number of sequences	10178	12	10190	99.88	0.12	Fg	P-Fg	DNA	ITS2
FL31_ITS2_DNA_number of ribotypes	414	3	417	99.28	0.72	Fg	P-Fg	DNA	ITS2
FL32_ITS2_cDNA_number of sequences	32656	7	32663	99.98	0.02	Fg	P-Fg	cDNA	ITS2
FL32_ITS2_cDNA_number of ribotypes	320	2	322	99.38	0.62	Fg	P-Fg	cDNA	ITS2
FL32_ITS2_DNA_number of sequences	14	0	14	100	0	Fg	P-Fg	DNA	ITS2
FL32_ITS2_DNA_number of ribotypes	4	0	4	100	0	Fg	P-Fg	DNA	ITS2
FL33_ITS2_cDNA_number of sequences	28183	3	28186	99.99	0.01	Fg	P-Fg	cDNA	ITS2
FL33_ITS2_cDNA_number of ribotypes	296	2	298	99.33	0.67	Fg	P-Fg	cDNA	ITS2
FL33_ITS2_DNA_number of sequences	3376	0	3376	100	0	Fg	P-Fg	DNA	ITS2
FL33_ITS2_DNA_number of ribotypes	142	0	142	100	0	Fg	P-Fg	DNA	ITS2
cDNA_number of sequences	92442	15	92457
cDNA_average number of sequences	30814	5	30819	99.98	0.017
cDNA_average number of sequences_st. dev.	2338.55	2	2340.46	0.01	0.01
DNA_number of sequences	13568	12	13580
DNA_average number of sequences	4522.67	4	4526.67	99.96	0.04
DNA_average number of sequences_st. dev.	5178.11	6.93	5184.67	0.07	0.07
	number of sequences					proportion of sequences (%)
Festuca glaucescens (4x) x Festuca pratensis (4x)	F. glaucescens-type	F. pratensis-type	Festuca-type (FG + FP)	Lolium-type	total	F. glaucescens-type	F. pratensis-type	Lolium-type	Cross	Generation	Template	Region
FL1_ITS2_cDNA_number of sequences	129	15947	16076	30	16106	0.8	99.01	0.19	FgxFp	F1	cDNA	ITS2
FL1_ITS2_cDNA_number of ribotypes	12	754	766	7	773	1.55	97.54	0.91	FgxFp	F1	cDNA	ITS2
FL1_ITS2_DNA_number of sequences	2138	758	2896	1	2897	73.8	26.16	0.03	FgxFp	F1	DNA	ITS2
FL1_ITS2_DNA_number of ribotypes	75	77	152	1	153	49.02	50.33	0.65	FgxFp	F1	DNA	ITS2
FL2_ITS2_cDNA_number of sequences	1	17648	17649	8	17657	0.01	99.95	0.05	FgxFp	F1	cDNA	ITS2
FL2_ITS2_cDNA_number of ribotypes	1	558	559	6	565	0.18	98.76	1.06	FgxFp	F1	cDNA	ITS2
FL2_ITS2_DNA_number of sequences	1380	2429	3809	1	3810	36.22	63.75	0.03	FgxFp	F1	DNA	ITS2
FL2_ITS2_DNA_number of ribotypes	54	143	197	1	198	27.27	72.22	0.51	FgxFp	F1	DNA	ITS2
FL3_ITS2_cDNA_number of sequences	4	27536	27540	9	27549	0.01	99.95	0.03	FgxFp	F1	cDNA	ITS2
FL3_ITS2_cDNA_number of ribotypes	2	786	788	7	795	0.25	98.87	0.88	FgxFp	F1	cDNA	ITS2
FL3_ITS2_DNA_number of sequences	5292	9533	14825	33	14858	35.62	64.16	0.22	FgxFp	F1	DNA	ITS2
FL3_ITS2_DNA_number of ribotypes	176	362	538	8	546	32.23	66.3	1.47	FgxFp	F1	DNA	ITS2
FL4_ITS2_cDNA_number of sequences	5102	26874	31976	17	31993	15.95	84	0.05	FgxFp	F1	cDNA	ITS2
FL4_ITS2_cDNA_number of ribotypes	115	857	972	6	978	11.76	87.63	0.61	FgxFp	F1	cDNA	ITS2
FL4_ITS2_DNA_number of sequences	4300	20878	25178	8	25186	17.07	82.9	0.03	FgxFp	F1	DNA	ITS2
FL4_ITS2_DNA_number of ribotypes	110	600	710	8	718	15.32	83.57	1.11	FgxFp	F1	DNA	ITS2
FL5_ITS2_cDNA_number of sequences	3	30907	30910	21	30931	0.01	99.92	0.07	FgxFp	F1	cDNA	ITS2
FL5_ITS2_cDNA_number of ribotypes	3	708	711	10	721	0.42	98.2	1.39	FgxFp	F1	cDNA	ITS2
FL5_ITS2_DNA_number of sequences	7907	23652	31559	9	31568	25.05	74.92	0.03	FgxFp	F1	DNA	ITS2
FL5_ITS2_DNA_number of ribotypes	187	643	830	7	837	22.34	76.82	0.84	FgxFp	F1	DNA	ITS2
cDNA_number of sequences	5239	118912	124151	85	124236
cDNA_average number of sequences	1047.8	23782.4	24830.2	17	24847.2	3.356	96.566	0.078
cDNA_average number of sequences_st. dev.	2267.03	6584.68	7476.21	9.08	7474.66	7.05	7.04	0.06
DNA_number of sequences	21017	57250	78267	52	78319
DNA_average number of sequences	4203.4	11450	15653.4	10.4	15663.8	37.552	62.378	0.068
DNA_average number of sequences_st. dev.	2605.21	10454	12722.4	13.18	12725.6	21.77	21.77	0.08
						proportion of sequences (%)
Festuca glaucescens (4x)	F. glaucescens-type	F. pratensis-type	Festuca-type (FG + FP)	Lolium-type	total	F. glaucescens-type	F. pratensis-type	Lolium-type	Cross	Generation	Template	Region
FL31_ITS2_cDNA_number of sequences	31596	7	31603	5	31608	99.96	0.02	0.02	Fg	P-Fg	cDNA	ITS2
FL31_ITS2_cDNA_number of ribotypes	1535	1	1536	5	1541	99.61	0.06	0.32	Fg	P-Fg	cDNA	ITS2
FL31_ITS2_DNA_number of sequences	10176	2	10178	12	10190	99.86	0.02	0.12	Fg	P-Fg	DNA	ITS2
FL31_ITS2_DNA_number of ribotypes	413	1	414	3	417	99.04	0.24	0.72	Fg	P-Fg	DNA	ITS2
FL32_ITS2_cDNA_number of sequences	32651	5	32656	7	32663	99.96	0.02	0.02	Fg	P-Fg	cDNA	ITS2
FL32_ITS2_cDNA_number of ribotypes	318	2	320	2	322	98.76	0.62	0.62	Fg	P-Fg	cDNA	ITS2
FL32_ITS2_DNA_number of sequences	14	0	14	0	14	100	0	0	Fg	P-Fg	DNA	ITS2
FL32_ITS2_DNA_number of ribotypes	4	0	4	0	4	100	0	0	Fg	P-Fg	DNA	ITS2
FL33_ITS2_cDNA_number of sequences	28182	1	28183	3	28186	99.99	0	0.01	Fg	P-Fg	cDNA	ITS2
FL33_ITS2_cDNA_number of ribotypes	295	1	296	2	298	98.99	0.34	0.67	Fg	P-Fg	cDNA	ITS2
FL33_ITS2_DNA_number of sequences	3376	0	3376	0	3376	100	0	0	Fg	P-Fg	DNA	ITS2
FL33_ITS2_DNA_number of ribotypes	142	0	142	0	142	100	0	0	Fg	P-Fg	DNA	ITS2
cDNA_number of sequences	92429	13	92442	15	92457
cDNA_average number of sequences	30809.7	4.33333	30814	5	30819	99.97	0.013	0.017
cDNA_average number of sequences_st. dev.	2335.96	3.06	2338.55	2	2340.46	0.02	0.01	0.01
DNA_number of sequences	13566	2	13568	12	13580
DNA_average number of sequences	4522	0.666667	4522.67	4	4526.67	99.95	0.01	0.04
DNA_average number of sequences_st. dev.	5177.02	1.15	5178.11	6.93	5184.67	0.08	0.01	0.07
						proportion of sequences (%)
Festuca pratensis (4x)	F. glaucescens-type	F. pratensis-type	Festuca-type (FG + FP)	Lolium-type	total	F. glaucescens-type	F. pratensis-type	Lolium-type	Cross	Generation	Template	Region
FL34_ITS2_cDNA_number of sequences	1	17846	17847	14	17861	0.01	99.92	0.08	Fp	P-Fp	cDNA	ITS2
FL34_ITS2_cDNA_number of ribotypes	1	139	140	6	146	0.68	95.21	4.11	Fp	P-Fp	cDNA	ITS2
FL34_ITS2_DNA_number of sequences	2	364	366	4	370	0.54	98.38	1.08	Fp	P-Fp	DNA	ITS2
FL34_ITS2_DNA_number of ribotypes	2	37	39	3	42	4.76	88.1	7.14	Fp	P-Fp	DNA	ITS2
FL35_ITS2_cDNA_number of sequences	0	9387	9387	0	9387	0	100	0	Fp	P-Fp	cDNA	ITS2
FL35_ITS2_cDNA_number of ribotypes	0	77	77	0	77	0	100	0	Fp	P-Fp	cDNA	ITS2
FL35_ITS2_DNA_number of sequences	2	4391	4393	28	4421	0.05	99.32	0.63	Fp	P-Fp	DNA	ITS2
FL35_ITS2_DNA_number of ribotypes	2	271	273	5	278	0.72	97.48	1.8	Fp	P-Fp	DNA	ITS2
FL36_ITS2_cDNA_number of sequences	1	31850	31851	10	31861	0	99.97	0.03	Fp	P-Fp	cDNA	ITS2
FL36_ITS2_cDNA_number of ribotypes	1	326	327	4	331	0.3	98.49	1.21	Fp	P-Fp	cDNA	ITS2
FL36_ITS2_DNA_number of sequences	30	19119	19149	166	19315	0.16	98.99	0.86	Fp	P-Fp	DNA	ITS2
FL36_ITS2_DNA_number of ribotypes	5	706	711	37	748	0.67	94.39	4.95	Fp	P-Fp	DNA	ITS2
FL39_ITS2_cDNA_number of sequences	0	24630	24630	19	24649	0	99.92	0.08	Fp	P-Fp	cDNA	ITS2
FL39_ITS2_cDNA_number of ribotypes	0	714	714	6	720	0	99.17	0.83	Fp	P-Fp	cDNA	ITS2
FL39_ITS2_DNA_number of sequences	2	404	406	68	474	0.42	85.23	14.35	Fp	P-Fp	DNA	ITS2
FL39_ITS2_DNA_number of ribotypes	1	58	59	5	64	1.56	90.63	7.81	Fp	P-Fp	DNA	ITS2
FL40_ITS2_cDNA_number of sequences	0	18406	18406	7	18413	0	99.96	0.04	Fp	P-Fp	cDNA	ITS2
FL40_ITS2_cDNA_number of ribotypes	0	164	164	3	167	0	98.2	1.8	Fp	P-Fp	cDNA	ITS2
FL40_ITS2_DNA_number of sequences	0	5	5	0	5	0	100	0	Fp	P-Fp	DNA	ITS2
FL40_ITS2_DNA_number of ribotypes	0	1	1	0	1	0	100	0	Fp	P-Fp	DNA	ITS2
cDNA_number of sequences	2	102119	102121	50	102171
cDNA_average number of sequences	0.4	20423.8	20424.2	10	20434.2	0.002	99.954	0.046
cDNA_average number of sequences_st. dev.	0.55	8378.21	8378.48	7.18	8382.77	0	0.03	0.03
DNA_number of sequences	36	24283	24319	266	24585
DNA_average number of sequences	7.2	4856.6	4863.8	53.2	4917	0.234	96.384	3.384
DNA_average number of sequences_st. dev.	12.77	8172.82	8185.33	68.61	8247.6	0.24	6.26	6.14
