# Supplementary material for: Uniparental expression of ribosomal RNA in ×Festulolium grasses: a link between the genome and nucleolar dominance
Source: Front Plant Sci. 2023 Sep 18;14:1276252. doi: 10.3389/fpls.2023.1276252 (PMC10544908; doi:10.3389/fpls.2023.1276252)
Supplement: Supplementary Table 2 — rDNA (ribotype) diversity of F. pratensis (4x) × L. multiflorum (4x) hybrids. For each genotype, the diversity of the parental types (homeologues) estimated from the subsampled number of sequences is given for DNA and cDNA templates. For ITS1 and ITS2, 334 and 370 sequences were used for the calculations, respectively. The ITS1 and ITS datasets are presented on separate sheets. [file Table_2.xlsx]

## Sheet: Legend
Supplementary Table 2. rDNA (ribotype) diversity of F. pratensis (4x) × L. multiflorum (4x) hybrids. For each genotype, the diversity of the parental types (homeologues) estimated from the subsampled number of sequences is given for DNA and cDNA templates. For ITS1 and ITS2, 334 and 370 sequences were used for the calculations, respectively. The ITS1 and ITS datasets are presented on separate she…

## Sheet: ITS1_dataset
hybrid combination/sample
	ribotype diversity
Festuca pratensis (4x) x Lolium multiflorum (4x)	Festuca-type	Lolium-type	total	Cross	Generation	Template	Region
FL6_ITS1_cDNA_ribotype diversity	0	0.051	0.051	FpxLm	F1	cDNA	ITS1
FL6_ITS1_DNA_ribotype diversity	0.018	0.183	0.201	FpxLm	F1	DNA	ITS1
FL7_ITS1_cDNA_ribotype diversity	0	0.117	0.0117	FpxLm	F1	cDNA	ITS1
FL7_ITS1_DNA_ribotype diversity	0.069	0.075	0.144	FpxLm	F1	DNA	ITS1
FL8_ITS1_cDNA_ribotype diversity	0.003	0.114	0.117	FpxLm	F1	cDNA	ITS1
FL8_ITS1_DNA_ribotype diversity	0.048	0.141	0.189	FpxLm	F1	DNA	ITS1
FL9_ITS1_cDNA_ribotype diversity	0.003	0.078	0.081	FpxLm	F1	cDNA	ITS1
FL9_ITS1_DNA_ribotype diversity	0.039	0.099	0.138	FpxLm	F1	DNA	ITS1
FL10_ITS1_cDNA_ribotype diversity	0.003	0.087	0.09	FpxLm	F1	cDNA	ITS1
FL10_ITS1_DNA_ribotype diversity	0.069	0.126	0.195	FpxLm	F1	DNA	ITS1
cDNA_average ribotype diversity	0.00179641	0.0892216	0.07
cDNA_average ribotype diversity_st. dev.	0.002	0.027	0.04
DNA_average ribotype diversity	0.048503	0.124551	0.173
DNA_average ribotype diversity_st. dev.	0.022	0.041	0.03
FL18_ITS1_cDNA_ribotype diversity	0	0.0538922	0.0538922	FpxLm	F2	cDNA	ITS1
FL18_ITS1_DNA_ribotype diversity	0.0598802	0.116766	0.176647	FpxLm	F2	DNA	ITS1
FL19_ITS1_cDNA_ribotype diversity	0	0.0778443	0.0778443	FpxLm	F2	cDNA	ITS1
FL19_ITS1_DNA_ribotype diversity	0.0568862	0.116766	0.173653	FpxLm	F2	DNA	ITS1
cDNA_average ribotype diversity	0	0.0658683	0.0658683
cDNA_average ribotype diversity_st. dev.	0	0.017	0.017
DNA_average ribotype diversity	0.0583832	0.116766	0.17515
DNA_average ribotype diversity_st. dev.	0.002	0	0.002
FL26_ITS1_cDNA_ribotype diversity	0.00299401	0.128743	0.131737	FpxLm	F3	cDNA	ITS1
FL26_ITS1_DNA_ribotype diversity	0.0568862	0.0988024	0.155689	FpxLm	F3	DNA	ITS1
FL20_ITS1_cDNA_ribotype diversity	0	0.0299401	0.0299401	FpxLm	BC1	cDNA	ITS1
FL20_ITS1_DNA_ribotype diversity	0.0538922	0.149701	0.203593	FpxLm	BC1	DNA	ITS1
FL21_ITS1_cDNA_ribotype diversity	0	0.0359281	0.0359281	FpxLm	BC1	cDNA	ITS1
FL21_ITS1_DNA_ribotype diversity	0.0538922	0.146707	0.200599	FpxLm	BC1	DNA	ITS1
FL22_ITS1_cDNA_ribotype diversity	0	0.110778	0.110778	FpxLm	BC1	cDNA	ITS1
FL22_ITS1_DNA_ribotype diversity	0.0479042	0.0778443	0.125749	FpxLm	BC1	DNA	ITS1
FL23_ITS1_cDNA_ribotype diversity	0.00299401	0.140719	0.143713	FpxLm	BC1	cDNA	ITS1
FL23_ITS1_DNA_ribotype diversity	0.0868263	0.116766	0.203593	FpxLm	BC1	DNA	ITS1
FL24_ITS1_cDNA_ribotype diversity	0	0.128743	0.128743	FpxLm	BC1	cDNA	ITS1
FL24_ITS1_DNA_ribotype diversity	0.0688623	0.116766	0.185629	FpxLm	BC1	DNA	ITS1
FL25_ITS1_cDNA_ribotype diversity	0	0.107784	0.107784	FpxLm	BC1	cDNA	ITS1
FL25_ITS1_DNA_ribotype diversity	0.0568862	0.107784	0.164671	FpxLm	BC1	DNA	ITS1
cDNA_average ribotype diversity	0.000499002	0.0923154	0.0928144
cDNA_average ribotype diversity_st. dev.	0.001	0.048	0.048
DNA_average ribotype diversity	0.0613772	0.119261	0.180639
DNA_average ribotype diversity_st. dev.	0.014	0.027	0.031
	ribotype diversity
Lolium multiflorum (4x)	Festuca-type	Lolium-type	total	Cross	Generation	Template	Region
FL37_ITS1_cDNA_ribotype diversity	0	0.0329341	0.0329341	Lm	P-Lm	cDNA	ITS1
FL37_ITS1_DNA_ribotype diversity	0.00898204	0.164671	0.173653	Lm	P-Lm	DNA	ITS1
FL42_ITS1_cDNA_ribotype diversity	0	0.0898204	0.0898204	Lm	P-Lm	cDNA	ITS1
FL42_ITS1_DNA_ribotype diversity	0.0179641	0.143713	0.161677	Lm	P-Lm	DNA	ITS1
FL43_ITS1_cDNA_ribotype diversity	0	0.0538922	0.0538922	Lm	P-Lm	cDNA	ITS1
FL43_ITS1_DNA_ribotype diversity	0.0269461	0.0958084	0.122754	Lm	P-Lm	DNA	ITS1
cDNA_average ribotype diversity	0	0.0588822	0.0588822
cDNA_average ribotype diversity_st. dev.	0	0.029	0.029
DNA_average ribotype diversity	0.0179641	0.134731	0.152695
DNA_average ribotype diversity_st. dev.	0.009	0.035	0.027
	ribotype diversity
Festuca pratensis (4x)	Festuca-type	Lolium-type	total	Cross	Generation	Template	Region
FL34_ITS1_cDNA_ribotype diversity	0.0209581	0.00299401	0.0239521	Fp	P-Fp	cDNA	ITS1
FL34_ITS1_DNA_ribotype diversity	0.0508982	0	0.0508982	Fp	P-Fp	DNA	ITS1
FL35_ITS1_cDNA_ribotype diversity	0.0179641	0	0.0179641	Fp	P-Fp	cDNA	ITS1
FL35_ITS1_DNA_ribotype diversity	0.0359281	0	0.0359281	Fp	P-Fp	DNA	ITS1
FL36_ITS1_cDNA_ribotype diversity	0.0329341	0	0.0329341	Fp	P-Fp	cDNA	ITS1
FL36_ITS1_DNA_ribotype diversity	0.0299401	0	0.0299401	Fp	P-Fp	DNA	ITS1
FL39_ITS1_cDNA_ribotype diversity	0.0359281	0	0.0359281	Fp	P-Fp	cDNA	ITS1
FL39_ITS1_DNA_ribotype diversity	0.0658683	0.00299401	0.0688623	Fp	P-Fp	DNA	ITS1
cDNA_average ribotype diversity	0.0269461	0.000748503	0.0276946
cDNA_average ribotype diversity_st. dev.	0.009	0.001	0.008
DNA_average ribotype diversity	0.0456587	0.000748503	0.0464072
DNA_average ribotype diversity_st. dev.	0.016	0.001	0.017
	ribotype diversity
Festuca pratensis (2x)	Festuca-type	Lolium-type	total	Cross	Generation	Template	Region
FL40_ITS1_cDNA_ribotype diversity	0.0718563	0.00299401	0.0748503	Fp	P-Fp	cDNA	ITS1
FL40_ITS1_DNA_ribotype diversity	0.107784	0	0.107784	Fp	P-Fp	DNA	ITS1
	ribotype diversity
Lolium perenne (2x)	Festuca-type	Lolium-type	total	Cross	Generation	Template	Region
FL38_ITS1_cDNA_ribotype diversity	0	0.011976	0.011976	Lp	P-Lp	cDNA	ITS1
FL38_ITS1_DNA_ribotype diversity	0	0.107784	0.107784	Lp	P-Lp	DNA	ITS1
	ribotype diversity
Festuca glaucescens (4x)	Festuca-type	Lolium-type	total	Cross	Generation	Template	Region
FL31_ITS1_cDNA_ribotype diversity	0.0508982	0	0.0508982	Fg	P-Fg	cDNA	ITS1
FL31_ITS1_DNA_ribotype diversity	0.185629	0	0.185629	Fg	P-Fg	DNA	ITS1
FL32_ITS1_cDNA_ribotype diversity	0.10479	0	0.10479	Fg	P-Fg	cDNA	ITS1
FL32_ITS1_DNA_ribotype diversity	0.125749	0	0.125749	Fg	P-Fg	DNA	ITS1
FL33_ITS1_cDNA_ribotype diversity	0.0538922	0	0.0538922	Fg	P-Fg	cDNA	ITS1
FL33_ITS1_DNA_ribotype diversity	0.131737	0	0.131737	Fg	P-Fg	DNA	ITS1
cDNA_average ribotype diversity	0.0698603	0	0.0698603
cDNA_average ribotype diversity_st. dev.	0.03	0	0.03
DNA_average ribotype diversity	0.147705	0	0.147705
DNA_average ribotype diversity_st. dev.	0.033	0	0.033

## Sheet: ITS2_dataset
hybrid combination/sample
	ribotype diversity
Festuca pratensis (4x) x Lolium multiflorum (4x)	Festuca-type	Lolium-type	total	Cross	Generation	Template	Region
FL6_ITS2_cDNA_ribotype diversity	0	0.127	0.127	FpxLm	F1	cDNA	ITS2
FL6_ITS2_DNA_ribotype diversity	0	0.203	0.203	FpxLm	F1	DNA	ITS2
FL7_ITS2_cDNA_ribotype diversity	0	0.114	0.114	FpxLm	F1	cDNA	ITS2
FL7_ITS2_DNA_ribotype diversity	0.00299401	0.181	0.184	FpxLm	F1	DNA	ITS2
FL8_ITS2_cDNA_ribotype diversity	0	0.114	0.114	FpxLm	F1	cDNA	ITS2
FL8_ITS2_DNA_ribotype diversity	0.00299401	0.114	0.116	FpxLm	F1	DNA	ITS2
FL9_ITS2_cDNA_ribotype diversity	0	0.065	0.065	FpxLm	F1	cDNA	ITS2
FL9_ITS2_DNA_ribotype diversity	0.00598802	0.158683	0.164671	FpxLm	F1	DNA	ITS2
FL10_ITS2_cDNA_ribotype diversity	0	0.113772	0.113772	FpxLm	F1	cDNA	ITS2
FL10_ITS2_DNA_ribotype diversity	0.005	0.146	0.149	FpxLm	F1	DNA	ITS2
cDNA_average ribotype diversity	0	0.107	0.107
cDNA_average ribotype diversity_st. dev.	0	0.024	0.024
DNA_average ribotype diversity	0.003	0.161	0.163
DNA_average ribotype diversity_st. dev.	0.002	0.034	0.033
FL18_ITS2_cDNA_ribotype diversity	0.00299401	0.273	0.276	FpxLm	F2	cDNA	ITS2
FL18_ITS2_DNA_ribotype diversity	0.005	0.141	0.146	FpxLm	F2	DNA	ITS2
FL19_ITS2_cDNA_ribotype diversity	0	0.273	0.273	FpxLm	F2	cDNA	ITS2
FL19_ITS2_DNA_ribotype diversity	0.011	0.214	0.224	FpxLm	F2	DNA	ITS2
cDNA_average ribotype diversity	0.00149701	0.273	0.275
cDNA_average ribotype diversity_st. dev.	0.002	0	0.002
DNA_average ribotype diversity	0.008	0.178	0.185
DNA_average ribotype diversity_st. dev.	0.004	0.052	0.055
FL26_ITS2_cDNA_ribotype diversity	0	0.073	0.073	FpxLm	F3	cDNA	ITS2
FL26_ITS2_DNA_ribotype diversity	0.016	0.197	0.214	FpxLm	F3	DNA	ITS2
FL20_ITS2_cDNA_ribotype diversity	0	0.238	0.238	FpxLm	BC1	cDNA	ITS2
FL20_ITS2_DNA_ribotype diversity	0.011	0.211	0.222	FpxLm	BC1	DNA	ITS2
FL21_ITS2_cDNA_ribotype diversity	0	0.216	0.216	FpxLm	BC1	cDNA	ITS2
FL21_ITS2_DNA_ribotype diversity	0.027	0.197	0.224	FpxLm	BC1	DNA	ITS2
FL22_ITS2_cDNA_ribotype diversity	0	0.157	0.157	FpxLm	BC1	cDNA	ITS2
FL22_ITS2_DNA_ribotype diversity	0.011	0.114	0.124	FpxLm	BC1	DNA	ITS2
FL23_ITS2_cDNA_ribotype diversity	0	0.203	0.203	FpxLm	BC1	cDNA	ITS2
FL23_ITS2_DNA_ribotype diversity	0.00299401	0.181	0.184	FpxLm	BC1	DNA	ITS2
FL24_ITS2_cDNA_ribotype diversity	0	0.235	0.235	FpxLm	BC1	cDNA	ITS2
FL24_ITS2_DNA_ribotype diversity	NA	NA	NA	FpxLm	BC1	DNA	ITS2
FL25_ITS2_cDNA_ribotype diversity	0	0.073	0.073	FpxLm	BC1	cDNA	ITS2
FL25_ITS2_DNA_ribotype diversity	0.00299401	0.132	0.135	FpxLm	BC1	DNA	ITS2
cDNA_average ribotype diversity	0	0.187	0.187
cDNA_average ribotype diversity_st. dev.	0	0.063	0.063
DNA_average ribotype diversity	0.011	0.167	0.178
DNA_average ribotype diversity_st. dev.	0.01	0.042	0.047
	ribotype diversity
Lolium multiflorum (4x)	Festuca-type	Lolium-type	total	Cross	Generation	Template	Region
FL37_ITS2_cDNA_ribotype diversity	0	0.024	0.024	Lm	P-Lm	cDNA	ITS2
FL37_ITS2_DNA_ribotype diversity	0	0.192	0.192	Lm	P-Lm	DNA	ITS2
FL42_ITS2_cDNA_ribotype diversity	0	0.027	0.027	Lm	P-Lm	cDNA	ITS2
FL42_ITS2_DNA_ribotype diversity	0	0.157	0.157	Lm	P-Lm	DNA	ITS2
FL43_ITS2_cDNA_ribotype diversity	0	0.014	0.014	Lm	P-Lm	cDNA	ITS2
FL43_ITS2_DNA_ribotype diversity	0.00299401	0.116	0.119	Lm	P-Lm	DNA	ITS2
cDNA_average ribotype diversity	0	0.022	0.022
cDNA_average ribotype diversity_st. dev.	0	0.007	0.007
DNA_average ribotype diversity	0.000998004	0.155	0.156
DNA_average ribotype diversity_st. dev.	0.002	0.038	0.037
	ribotype diversity
Festuca pratensis (4x)	Festuca-type	Lolium-type	total	Cross	Generation	Template	Region
FL34_ITS2_cDNA_ribotype diversity	0.008	0	0.008	Fp	P-Fp	cDNA	ITS2
FL34_ITS2_DNA_ribotype diversity	0.105	0.008	0.114	Fp	P-Fp	DNA	ITS2
FL35_ITS2_cDNA_ribotype diversity	0.005	0	0.005	Fp	P-Fp	cDNA	ITS2
FL35_ITS2_DNA_ribotype diversity	0.089	0.008	0.097	Fp	P-Fp	DNA	ITS2
FL36_ITS2_cDNA_ribotype diversity	0.005	0	0.005	Fp	P-Fp	cDNA	ITS2
FL36_ITS2_DNA_ribotype diversity	0.086	0.005	0.092	Fp	P-Fp	DNA	ITS2
FL39_ITS2_cDNA_ribotype diversity	0.043	0	0.043	Fp	P-Fp	cDNA	ITS2
FL39_ITS2_DNA_ribotype diversity	0.127	0.011	0.138	Fp	P-Fp	DNA	ITS2
cDNA_average ribotype diversity	0.015	0	0.015
cDNA_average ribotype diversity_st. dev.	0.019	0	0.019
DNA_average ribotype diversity	0.102	0.008	0.11
DNA_average ribotype diversity_st. dev.	0.019	0.002	0.021
	ribotype diversity
Festuca pratensis (2x)	Festuca-type	Lolium-type	total	Cross	Generation	Template	Region
FL40_ITS2_cDNA_ribotype diversity	0.014	0.00299401	0.016	Fp	P-Fp	cDNA	ITS2
FL40_ITS2_DNA_ribotype diversity	NA	NA	NA	Fp	P-Fp	DNA	ITS2
	ribotype diversity
Lolium perenne (2x)	Festuca-type	Lolium-type	total	Cross	Generation	Template	Region
FL38_ITS2_cDNA_ribotype diversity	0	0.051	0.051	Lp	P-Lp	cDNA	ITS2
FL38_ITS2_DNA_ribotype diversity	0	0.262	0.262	Lp	P-Lp	DNA	ITS2
	ribotype diversity
Festuca glaucescens (4x)	Festuca-type	Lolium-type	total	Cross	Generation	Template	Region
FL31_ITS2_cDNA_ribotype diversity	0.213	0	0.213	Fg	P-Fg	cDNA	ITS2
FL31_ITS2_DNA_ribotype diversity	0.159	0.00299401	0.162	Fg	P-Fg	DNA	ITS2
FL32_ITS2_cDNA_ribotype diversity	0.022	0	0.022	Fg	P-Fg	cDNA	ITS2
FL32_ITS2_DNA_ribotype diversity	NA	NA	NA	Fg	P-Fg	DNA	ITS2
FL33_ITS2_cDNA_ribotype diversity	0.089	0	0.089	Fg	P-Fg	cDNA	ITS2
FL33_ITS2_DNA_ribotype diversity	0.157	0	0.157	Fg	P-Fg	DNA	ITS2
cDNA_average ribotype diversity	0.108	0	0.108
cDNA_average ribotype diversity_st. dev.	0.097	0	0.097
DNA_average ribotype diversity	0.158	0.00149701	0.16
DNA_average ribotype diversity_st. dev.	0.001	0.002	0.004
