# Supplementary material for: Uniparental expression of ribosomal RNA in ×Festulolium grasses: a link between the genome and nucleolar dominance
Source: Front Plant Sci. 2023 Sep 18;14:1276252. doi: 10.3389/fpls.2023.1276252 (PMC10544908; doi:10.3389/fpls.2023.1276252)
Supplement: Supplementary Table 3 — Barcoding tags used in this study. [file Table_3.xlsx]

## Sheet: Legend
Supplementary Table 3. Barcoding tags used in this study.

## Sheet: Sheet1
Marker	Template	Barcode F	Barcode R	Sample name
ITS1	cDNA	TACAATATCTGT	ACAGATATTGTA	FL1_ITS1_7_cDNA
ITS1	cDNA	GACTCAACCAGT	ACTGGTTGAGTC	FL2_ITS1_9_cDNA
ITS1	cDNA	ACTACTGAGGAT	ATCCTCAGTAGT	FL3_ITS1_11_cDNA
ITS1	cDNA	AATTCACCTCCT	AGGAGGTGAATT	FL4_ITS1_12_cDNA
ITS1	cDNA	ATGCTGCAACAC	GTGTTGCAGCAT	FL5_ITS1_14_cDNA
ITS1	cDNA	TTCCTTAGTAGT	ACTACTAAGGAA	FL6_ITS1_16_cDNA
ITS1	cDNA	GGTTGCCCTGTA	TACAGGGCAACC	FL7_ITS1_19_cDNA
ITS1	cDNA	TGACTAATGGCC	GGCCATTAGTCA	FL8_ITS1_25_cDNA
ITS1	cDNA	TGATATCGTCTT	AAGACGATATCA	FL9_ITS1_31_cDNA
ITS1	cDNA	GAGATACAGTTC	GAACTGTATCTC	FL10_ITS1_36_cDNA
ITS1	cDNA	AATCTTGCGCCG	CGGCGCAAGATT	FL11_ITS1_45_cDNA
ITS1	cDNA	AATAACTAGGGT	ACCCTAGTTATT	FL12_ITS1_47_cDNA
ITS1	cDNA	AGTAAAGATCGT	ACGATCTTTACT	FL13_ITS1_51_cDNA
ITS1	cDNA	GTTGATACGATG	CATCGTATCAAC	FL14_ITS1_55_cDNA
ITS1	cDNA	TTGCTGGACGCT	AGCGTCCAGCAA	FL15_ITS1_63_cDNA
ITS1	cDNA	TACTAACGCGGT	ACCGCGTTAGTA	FL16_ITS1_64_cDNA
ITS1	cDNA	GCGATCACACCT	AGGTGTGATCGC	FL17_ITS1_65_cDNA
ITS1	cDNA	GAAGAGGGTTGA	TCAACCCTCTTC	FL18_ITS1_67_cDNA
ITS1	cDNA	TGAGTGGTCTGT	ACAGACCACTCA	FL19_ITS1_68_cDNA
ITS1	cDNA	ACGACGCATTTG	CAAATGCGTCGT	FL20_ITS1_70_cDNA
ITS1	cDNA	TAAATATACCCT	AGGGTATATTTA	FL21_ITS1_74_cDNA
ITS1	cDNA	TTGCGGACCCTA	TAGGGTCCGCAA	FL22_ITS1_75_cDNA
ITS1	cDNA	GTCGTCCAAATG	CATTTGGACGAC	FL23_ITS1_76_cDNA
ITS1	cDNA	TATTTGATTGGT	ACCAATCAAATA	FL24_ITS1_83_cDNA
ITS1	cDNA	TGTCAAAGTGAC	GTCACTTTGACA	FL25_ITS1_84_cDNA
ITS1	cDNA	GAACCAGTACTC	GAGTACTGGTTC	FL26_ITS1_93_cDNA
ITS1	cDNA	GTGCCATAATCG	CGATTATGGCAC	FL27_ITS1_95_cDNA
ITS1	cDNA	ACCGAACAATCC	GGATTGTTCGGT	FL28_ITS1_101_cDNA
ITS1	cDNA	TCCACAGGGTTC	GAACCCTGTGGA	FL29_ITS1_115_cDNA
ITS1	cDNA	AGAGGGTGATCG	CGATCACCCTCT	FL30_ITS1_122_cDNA
ITS1	cDNA	ACATGATATTCT	AGAATATCATGT	FL31_ITS1_130_cDNA
ITS1	cDNA	TCGTTATTCAGT	ACTGAATAACGA	FL32_ITS1_133_cDNA
ITS1	cDNA	AATGTTCAACTT	AAGTTGAACATT	FL33_ITS1_135_cDNA
ITS1	cDNA	AGCAGTGCGGTG	CACCGCACTGCT	FL34_ITS1_136_cDNA
ITS1	cDNA	TAAGGCATCGCT	AGCGATGCCTTA	FL35_ITS1_142_cDNA
ITS1	cDNA	TAGCAGTTGCGT	ACGCAACTGCTA	FL36_ITS1_144_cDNA
ITS1	cDNA	TCATGGCCTCCG	CGGAGGCCATGA	FL37_ITS1_146_cDNA
ITS1	cDNA	TAGTTCGGTGAC	GTCACCGAACTA	FL38_ITS1_151_cDNA
ITS1	cDNA	TTAATGGATCGG	CCGATCCATTAA	FL39_ITS1_152_cDNA
ITS1	cDNA	TCAAGTCCGCAC	GTGCGGACTTGA	FL40_ITS1_153_cDNA
ITS1	cDNA	GTCAGGTGCGGC	GCCGCACCTGAC	FL41_ITS1_155_cDNA
ITS1	cDNA	ATGTGCTGCTCG	CGAGCAGCACAT	FL42_ITS1_158_cDNA
ITS1	cDNA	ATCGTAGTGGTC	GACCACTACGAT	FL43_ITS1_162_cDNA
ITS1	cDNA	GTCCGTCCTGGT	ACCAGGACGGAC	FL1rep_ITS1_165_cDNA
ITS1	cDNA	AACTCAATAGCG	CGCTATTGAGTT	FL30rep_ITS1_168_cDNA
ITS1	DNA	TACAATATCTGT	ACAGATATTGTA	FL1_ITS1_7_DNA
ITS1	DNA	GACTCAACCAGT	ACTGGTTGAGTC	FL2_ITS1_9_DNA
ITS1	DNA	ACTACTGAGGAT	ATCCTCAGTAGT	FL3_ITS1_11_DNA
ITS1	DNA	AATTCACCTCCT	AGGAGGTGAATT	FL4_ITS1_12_DNA
ITS1	DNA	ATGCTGCAACAC	GTGTTGCAGCAT	FL5_ITS1_14_DNA
ITS1	DNA	TTCCTTAGTAGT	ACTACTAAGGAA	FL6_ITS1_16_DNA
ITS1	DNA	GGTTGCCCTGTA	TACAGGGCAACC	FL7_ITS1_19_DNA
ITS1	DNA	TGACTAATGGCC	GGCCATTAGTCA	FL8_ITS1_25_DNA
ITS1	DNA	TGATATCGTCTT	AAGACGATATCA	FL9_ITS1_31_DNA
ITS1	DNA	GAGATACAGTTC	GAACTGTATCTC	FL10_ITS1_36_DNA
ITS1	DNA	AATCTTGCGCCG	CGGCGCAAGATT	FL11_ITS1_45_DNA
ITS1	DNA	AATAACTAGGGT	ACCCTAGTTATT	FL12_ITS1_47_DNA
ITS1	DNA	AGTAAAGATCGT	ACGATCTTTACT	FL13_ITS1_51_DNA
ITS1	DNA	GTTGATACGATG	CATCGTATCAAC	FL14_ITS1_55_DNA
ITS1	DNA	TTGCTGGACGCT	AGCGTCCAGCAA	FL15_ITS1_63_DNA
ITS1	DNA	TACTAACGCGGT	ACCGCGTTAGTA	FL16_ITS1_64_DNA
ITS1	DNA	GCGATCACACCT	AGGTGTGATCGC	FL17_ITS1_65_DNA
ITS1	DNA	GAAGAGGGTTGA	TCAACCCTCTTC	FL18_ITS1_67_DNA
ITS1	DNA	TGAGTGGTCTGT	ACAGACCACTCA	FL19_ITS1_68_DNA
ITS1	DNA	ACGACGCATTTG	CAAATGCGTCGT	FL20_ITS1_70_DNA
ITS1	DNA	TAAATATACCCT	AGGGTATATTTA	FL21_ITS1_74_DNA
ITS1	DNA	TTGCGGACCCTA	TAGGGTCCGCAA	FL22_ITS1_75_DNA
ITS1	DNA	GTCGTCCAAATG	CATTTGGACGAC	FL23_ITS1_76_DNA
ITS1	DNA	TATTTGATTGGT	ACCAATCAAATA	FL24_ITS1_83_DNA
ITS1	DNA	TGTCAAAGTGAC	GTCACTTTGACA	FL25_ITS1_84_DNA
ITS1	DNA	GAACCAGTACTC	GAGTACTGGTTC	FL26_ITS1_93_DNA
ITS1	DNA	GTGCCATAATCG	CGATTATGGCAC	FL27_ITS1_95_DNA
ITS1	DNA	ACCGAACAATCC	GGATTGTTCGGT	FL28_ITS1_101_DNA
ITS1	DNA	TCCACAGGGTTC	GAACCCTGTGGA	FL29_ITS1_115_DNA
ITS1	DNA	AGAGGGTGATCG	CGATCACCCTCT	FL30_ITS1_122_DNA
ITS1	DNA	ACATGATATTCT	AGAATATCATGT	FL31_ITS1_130_DNA
ITS1	DNA	TCGTTATTCAGT	ACTGAATAACGA	FL32_ITS1_133_DNA
ITS1	DNA	AATGTTCAACTT	AAGTTGAACATT	FL33_ITS1_135_DNA
ITS1	DNA	AGCAGTGCGGTG	CACCGCACTGCT	FL34_ITS1_136_DNA
ITS1	DNA	TAAGGCATCGCT	AGCGATGCCTTA	FL35_ITS1_142_DNA
ITS1	DNA	TAGCAGTTGCGT	ACGCAACTGCTA	FL36_ITS1_144_DNA
ITS1	DNA	TCATGGCCTCCG	CGGAGGCCATGA	FL37_ITS1_146_DNA
ITS1	DNA	TAGTTCGGTGAC	GTCACCGAACTA	FL38_ITS1_151_DNA
ITS1	DNA	TTAATGGATCGG	CCGATCCATTAA	FL39_ITS1_152_DNA
ITS1	DNA	TCAAGTCCGCAC	GTGCGGACTTGA	FL40_ITS1_153_DNA
ITS1	DNA	GTCAGGTGCGGC	GCCGCACCTGAC	FL41_ITS1_155_DNA
ITS1	DNA	ATGTGCTGCTCG	CGAGCAGCACAT	FL42_ITS1_158_DNA
ITS1	DNA	ATCGTAGTGGTC	GACCACTACGAT	FL43_ITS1_162_DNA
ITS1	DNA	GTCCGTCCTGGT	ACCAGGACGGAC	FL1rep_ITS1_165_DNA
ITS1	DNA	AACTCAATAGCG	CGCTATTGAGTT	FL30rep_ITS1_168_DNA
ITS2	cDNA	AGCCTTCGTCGC	GCGACGAAGGCT	FL1_ITS2_1_cDNA
ITS2	cDNA	TCCATACCGGAA	TTCCGGTATGGA	FL2_ITS2_2_cDNA
ITS2	cDNA	AGCCCTGCTACA	TGTAGCAGGGCT	FL3_ITS2_3_cDNA
ITS2	cDNA	CCTAACGGTCCA	TGGACCGTTAGG	FL4_ITS2_4_cDNA
ITS2	cDNA	CGCGCCTTAAAC	GTTTAAGGCGCG	FL5_ITS2_5_cDNA
ITS2	cDNA	TATGGTACCCAG	CTGGGTACCATA	FL6_ITS2_6_cDNA
ITS2	cDNA	TACAATATCTGT	ACAGATATTGTA	FL7_ITS2_7_cDNA
ITS2	cDNA	AATTTAGGTAGG	CCTACCTAAATT	FL8_ITS2_8_cDNA
ITS2	cDNA	GACTCAACCAGT	ACTGGTTGAGTC	FL9_ITS2_9_cDNA
ITS2	cDNA	GCCTCTACGTCG	CGACGTAGAGGC	FL10_ITS2_10_cDNA
ITS2	cDNA	ACTACTGAGGAT	ATCCTCAGTAGT	FL11_ITS2_11_cDNA
ITS2	cDNA	AATTCACCTCCT	AGGAGGTGAATT	FL12_ITS2_12_cDNA
ITS2	cDNA	CGTATAAATGCG	CGCATTTATACG	FL13_ITS2_13_cDNA
ITS2	cDNA	ATGCTGCAACAC	GTGTTGCAGCAT	FL14_ITS2_14_cDNA
ITS2	cDNA	ACTCGCTCGCTG	CAGCGAGCGAGT	FL15_ITS2_15_cDNA
ITS2	cDNA	CGTCCGTATGAA	TTCATACGGACG	FL16_ITS2_17_cDNA
ITS2	cDNA	ACGTGAGGAACG	CGTTCCTCACGT	FL17_ITS2_18_cDNA
ITS2	cDNA	GGTTGCCCTGTA	TACAGGGCAACC	FL18_ITS2_19_cDNA
ITS2	cDNA	CATATAGCCCGA	TCGGGCTATATG	FL19_ITS2_20_cDNA
ITS2	cDNA	GCCTATGAGATC	GATCTCATAGGC	FL20_ITS2_21_cDNA
ITS2	cDNA	CAAGTGAAGGGA	TCCCTTCACTTG	FL21_ITS2_22_cDNA
ITS2	cDNA	CACGTTTATTCC	GGAATAAACGTG	FL22_ITS2_23_cDNA
ITS2	cDNA	TAATCGGTGCCA	TGGCACCGATTA	FL23_ITS2_24_cDNA
ITS2	cDNA	TGACTAATGGCC	GGCCATTAGTCA	FL24_ITS2_25_cDNA
ITS2	cDNA	CGGGACACCCGA	TCGGGTGTCCCG	FL25_ITS2_26_cDNA
ITS2	cDNA	CTGTCTATACTA	TAGTATAGACAG	FL26_ITS2_27_cDNA
ITS2	cDNA	TATGCCAGAGAT	ATCTCTGGCATA	FL27_ITS2_28_cDNA
ITS2	cDNA	CGTTTGGAATGA	TCATTCCAAACG	FL28_ITS2_29_cDNA
ITS2	cDNA	AAGAACTCATGA	TCATGAGTTCTT	FL29_ITS2_30_cDNA
ITS2	cDNA	TGATATCGTCTT	AAGACGATATCA	FL30_ITS2_31_cDNA
ITS2	cDNA	CGGTGACCTACT	AGTAGGTCACCG	FL31_ITS2_32_cDNA
ITS2	cDNA	AATGCGCGTATA	TATACGCGCATT	FL32_ITS2_33_cDNA
ITS2	cDNA	CTTGATTCTTGA	TCAAGAATCAAG	FL33_ITS2_34_cDNA
ITS2	cDNA	GAAATCTTGAAG	CTTCAAGATTTC	FL34_ITS2_35_cDNA
ITS2	cDNA	GAGATACAGTTC	GAACTGTATCTC	FL35_ITS2_36_cDNA
ITS2	cDNA	GTGGAGTCTCAT	ATGAGACTCCAC	FL36_ITS2_37_cDNA
ITS2	cDNA	ACCTTACACCTT	AAGGTGTAAGGT	FL37_ITS2_38_cDNA
ITS2	cDNA	ATCTAGTGGCAA	TTGCCACTAGAT	FL38_ITS2_40_cDNA
ITS2	cDNA	ACGCTTAACGAC	GTCGTTAAGCGT	FL39_ITS2_41_cDNA
ITS2	cDNA	TACGGATTATGG	CCATAATCCGTA	FL40_ITS2_42_cDNA
ITS2	cDNA	ATACATGCAAGA	TCTTGCATGTAT	FL41_ITS2_43_cDNA
ITS2	cDNA	CTTAGTGCAGAA	TTCTGCACTAAG	FL42_ITS2_44_cDNA
ITS2	cDNA	AATCTTGCGCCG	CGGCGCAAGATT	FL43_ITS2_45_cDNA
ITS2	cDNA	AGGATCAGGGAA	TTCCCTGATCCT	FL1rep_ITS2_46_cDNA
ITS2	cDNA	AATAACTAGGGT	ACCCTAGTTATT	FL30rep_ITS2_47_cDNA
ITS2	DNA	AGCCTTCGTCGC	GCGACGAAGGCT	FL1_ITS2_1_DNA
ITS2	DNA	TCCATACCGGAA	TTCCGGTATGGA	FL2_ITS2_2_DNA
ITS2	DNA	AGCCCTGCTACA	TGTAGCAGGGCT	FL3_ITS2_3_DNA
ITS2	DNA	CCTAACGGTCCA	TGGACCGTTAGG	FL4_ITS2_4_DNA
ITS2	DNA	CGCGCCTTAAAC	GTTTAAGGCGCG	FL5_ITS2_5_DNA
ITS2	DNA	TATGGTACCCAG	CTGGGTACCATA	FL6_ITS2_6_DNA
ITS2	DNA	TACAATATCTGT	ACAGATATTGTA	FL7_ITS2_7_DNA
ITS2	DNA	AATTTAGGTAGG	CCTACCTAAATT	FL8_ITS2_8_DNA
ITS2	DNA	GACTCAACCAGT	ACTGGTTGAGTC	FL9_ITS2_9_DNA
ITS2	DNA	GCCTCTACGTCG	CGACGTAGAGGC	FL10_ITS2_10_DNA
ITS2	DNA	ACTACTGAGGAT	ATCCTCAGTAGT	FL11_ITS2_11_DNA
ITS2	DNA	AATTCACCTCCT	AGGAGGTGAATT	FL12_ITS2_12_DNA
ITS2	DNA	CGTATAAATGCG	CGCATTTATACG	FL13_ITS2_13_DNA
ITS2	DNA	ATGCTGCAACAC	GTGTTGCAGCAT	FL14_ITS2_14_DNA
ITS2	DNA	ACTCGCTCGCTG	CAGCGAGCGAGT	FL15_ITS2_15_DNA
ITS2	DNA	CGTCCGTATGAA	TTCATACGGACG	FL16_ITS2_17_DNA
ITS2	DNA	ACGTGAGGAACG	CGTTCCTCACGT	FL17_ITS2_18_DNA
ITS2	DNA	GGTTGCCCTGTA	TACAGGGCAACC	FL18_ITS2_19_DNA
ITS2	DNA	CATATAGCCCGA	TCGGGCTATATG	FL19_ITS2_20_DNA
ITS2	DNA	GCCTATGAGATC	GATCTCATAGGC	FL20_ITS2_21_DNA
ITS2	DNA	CAAGTGAAGGGA	TCCCTTCACTTG	FL21_ITS2_22_DNA
ITS2	DNA	CACGTTTATTCC	GGAATAAACGTG	FL22_ITS2_23_DNA
ITS2	DNA	TAATCGGTGCCA	TGGCACCGATTA	FL23_ITS2_24_DNA
ITS2	DNA	TGACTAATGGCC	GGCCATTAGTCA	FL24_ITS2_25_DNA
ITS2	DNA	CGGGACACCCGA	TCGGGTGTCCCG	FL25_ITS2_26_DNA
ITS2	DNA	CTGTCTATACTA	TAGTATAGACAG	FL26_ITS2_27_DNA
ITS2	DNA	TATGCCAGAGAT	ATCTCTGGCATA	FL27_ITS2_28_DNA
ITS2	DNA	CGTTTGGAATGA	TCATTCCAAACG	FL28_ITS2_29_DNA
ITS2	DNA	AAGAACTCATGA	TCATGAGTTCTT	FL29_ITS2_30_DNA
ITS2	DNA	TGATATCGTCTT	AAGACGATATCA	FL30_ITS2_31_DNA
ITS2	DNA	CGGTGACCTACT	AGTAGGTCACCG	FL31_ITS2_32_DNA
ITS2	DNA	AATGCGCGTATA	TATACGCGCATT	FL32_ITS2_33_DNA
ITS2	DNA	CTTGATTCTTGA	TCAAGAATCAAG	FL33_ITS2_34_DNA
ITS2	DNA	GAAATCTTGAAG	CTTCAAGATTTC	FL34_ITS2_35_DNA
ITS2	DNA	GAGATACAGTTC	GAACTGTATCTC	FL35_ITS2_36_DNA
ITS2	DNA	GTGGAGTCTCAT	ATGAGACTCCAC	FL36_ITS2_37_DNA
ITS2	DNA	ACCTTACACCTT	AAGGTGTAAGGT	FL37_ITS2_38_DNA
ITS2	DNA	ATCTAGTGGCAA	TTGCCACTAGAT	FL38_ITS2_40_DNA
ITS2	DNA	ACGCTTAACGAC	GTCGTTAAGCGT	FL39_ITS2_41_DNA
ITS2	DNA	TACGGATTATGG	CCATAATCCGTA	FL40_ITS2_42_DNA
ITS2	DNA	ATACATGCAAGA	TCTTGCATGTAT	FL41_ITS2_43_DNA
ITS2	DNA	CTTAGTGCAGAA	TTCTGCACTAAG	FL42_ITS2_44_DNA
ITS2	DNA	AATCTTGCGCCG	CGGCGCAAGATT	FL43_ITS2_45_DNA
ITS2	DNA	AGGATCAGGGAA	TTCCCTGATCCT	FL1rep_ITS2_46_DNA
ITS2	DNA	AATAACTAGGGT	ACCCTAGTTATT	FL30rep_ITS2_47_DNA
